# Predicting up to 10 year breast cancer risk using longitudinal mammographic screening history

## Authors

Xin Wang,<sup>1,2,3</sup> Tao Tan,<sup>1,4\*</sup> Yuan Gao,<sup>1,2,3</sup> Ruisheng Su,<sup>5</sup> Tianyu Zhang,<sup>1,2,3</sup> Luyi Han,<sup>1,3</sup> Jonas Teuwen,<sup>6</sup> Anna D'Angelo,<sup>1,7</sup> Caroline A. Drukker,<sup>8</sup> Marjanka K. Schmidt,<sup>9,10</sup> Regina Beets-Tan,<sup>1,2</sup> Nico Karssemeijer,<sup>11</sup> Ritse Mann<sup>1,3</sup>

## Affiliations

<sup>1</sup> Department of Radiology, The Netherlands Cancer Institute, Amsterdam, 1066 CX, The Netherlands.

<sup>2</sup> GROW School, Maastricht University, Maastricht, 6202 AZ, The Netherlands.

<sup>3</sup> Department of Radiology and Nuclear Medicine, Radboud University Medical Centre, Nijmegen, 6525 GA, The Netherlands.

<sup>4</sup> Faculty of Applied Sciences, Macao Polytechnic University, Macao SAR, 999078, China.

<sup>5</sup> Erasmus Medical Center, Erasmus University, Rotterdam, 3015 GD, The Netherlands.

<sup>6</sup> Department of Radiation Oncology, The Netherlands Cancer Institute, Amsterdam, 1066 CX, The Netherlands.

<sup>7</sup> Dipartimento di Diagnostica per Immagini, Radioterapia Oncologica ed Ematologia, Fondazione Policlinico Universitario A. Gemelli, IRCCS, 00168 Rome, Italy.

<sup>8</sup> Department of Surgical Oncology, The Netherlands Cancer Institute, Amsterdam, 1066 CX, The Netherlands.

<sup>9</sup> Division of Molecular Pathology, The Netherlands Cancer Institute, Amsterdam, 1066 CX, The Netherlands.

<sup>10</sup> Department of Epidemiology, The Netherlands Cancer Institute, Amsterdam, 1066 CX, The Netherlands.

<sup>11</sup> Department of Medical Imaging, Radboud University Medical Center, Nijmegen, 6500 HB, The Netherlands

\*Corresponding author

## Abstract

Risk assessment of breast cancer (BC) seeks to enhance individualized screening and prevention strategies. BC risk informs healthy individuals of the short- and long-term likelihood of cancer development, also enabling detection of existing BC. Recent mammographic-based deep learning (DL) risk models outperform traditional risk factor-based models and achieve state-of-the-art (SOTA) at short-term risk prediction, but mainly use single-time exams, which seem to rely more on detecting existing lesions. We present a novel temporospatial and explainable deep learning risk model, the Multi-Time

43 Point Breast Cancer Risk Model (MTP-BCR), which learns from longitudinal  
44 mammography data to identify subtle changes in breast tissue that may signal future  
45 malignancy. Utilizing a large in-house dataset of 171,168 screening mammograms from  
46 42,792 consecutive exams involving 9,133 women, our model demonstrates a significant  
47 improvement in long-term (10-year) risk prediction with an area under the receiver  
48 operating characteristics (AUC) of 0.80, outperforming the traditional BCSC 10-year risk  
49 model and other SOTA methods at 5-year AUC in various screening cohorts.  
50 Furthermore, MTP-BCR provides unilateral breast-level predictions, achieving AUCs up  
51 to 0.81 and 0.77 for 5-year risk and 10-year risk assessments, respectively. The heatmaps  
52 derived from our model may help clinicians better understand the progression from  
53 normal tissue to cancerous growth, enhancing interpretability in breast cancer risk  
54 assessment.

## 55 Teaser

56 MTP-BCR model uses multi-time points mammograms and rich risk factors to predict 10-  
57 year breast cancer risk more accurately.  
58

## 60 MAIN TEXT

### 63 Introduction

64 Breast cancer (BC) is one of the most common cancers in the world and is the cause of a  
65 large fraction of cancer-related mortality among women (1, 2). Studies have shown that  
66 age-based population-level BC screening programs, which aim to detect breast tumors at  
67 an early stage (3), reduces breast cancer specific mortality (4–7). However, the broad  
68 adoption of mammographic screening results also in high cost of imaging, false-positives  
69 and over-diagnoses, which explains the strong controversy of screening (8, 9). Therefore,  
70 “personalized” BC screening regimens are advocated, based on the individual women’s  
71 future risk of BC, which follows from demographic and genetic information, exposure to  
72 endogenous and exogenous risk factors, and also medical imaging (10–12). Current BC  
73 risk assessment models are designed to be sensitive to the high-risk population who could  
74 benefit from more aggressive screening and prevention. At the same time these models  
75 could advocate less frequent screening for the low-risk population to reduce the harm and  
76 cost of screening, however this is less common.  
77

78 Based upon the timespan for breast cancer prediction, risk models can be divided into  
79 short- and long-term risk models. Short-term risk models can be used to guide physicians  
80 in selecting and adding supplemental screening modalities for women at the time of  
81 screening. Long-term risk prediction helps determine risk-based screening regimens and  
82 eligibility for preventive treatment (13). Many of the traditional risk models, such as  
83 Tyrer-Cuzick (11), CANRISK (14), National Cancer Institute Breast Cancer Risk  
84 Assessment Tool (BCRAT) (12), and Breast Cancer Surveillance Consortium (BCSC)  
85 (15) investigate primarily long-term risk estimates. The performances of these risk models  
86 remain modest in clinical practice and are not very sensitive to short/middle-term cancer  
87 risk variation due to the shortage of individual-specific risk adaptation, for example  
88 through the incorporation of detailed imaging findings beyond breast density only. With  
89 the recent boost in deep learning (DL) methods, some studies that combined large  
90 screening mammography datasets with detailed risk factors have shown considerable  
91 promise to help balance the harm-to-benefit ratios of BC screening (7, 16–22) and were

92 even validated in clinical settings (23). For example, a recent study (19) developed a risk  
93 model, MIRAI, that achieved state-of-the-art (SOTA) performance in five-year BC risk  
94 prediction and outperformed the clinically adopted traditional models (19, 23–25).

95 However, most recent methods drive DL models to learn the risk output directly from an  
96 image or exam as single input without any historical reference (7, 16, 19). It's like judging  
97 the motion trajectory of an object in a still frame of a video. We hypothesize that accurate  
98 estimation of the breast tissue changes may make the task of predicting long-term BC risk  
99 easier. In clinical practice, radiologists routinely compare mammography exams to  
100 identify developing abnormalities. Therefore, beyond learning risk features (e.g. breast  
101 density) from single-time point imaging, multi-time point learning may also be helpful in  
102 discovering the underlying dynamics of the risk pattern for BC development (20, 26).  
103 Moreover, due to the lack of a long-term longitudinal screening mammogram dataset, the  
104 potential of image-based DL methods for longer-term (e.g., 10 years) BC risk prediction  
105 has been less explored. Only one recent research investigated the long-term performance  
106 of an image-based short-term risk model (27).

107 Despite the development of promising risk models in BC screening programs, the  
108 interpretability of medical AI models is still difficult, whereas understanding the predicted  
109 outputs is essential for clinical acceptance. How to endow an existing risk model with  
110 explainability of the underlying reasoning remains the boundary to explore. Apart from  
111 being similar to what an actual radiologist does when searching for the sign of BC risk  
112 (28, 29), the AI models must reasonably show radiologists more details during inference  
113 (30) for clinical acceptance. However, most recent studies only aim to predict the patient-  
114 level risk and do not produce a location-specific risk. Improvement of these specific  
115 predictions and visualizations could not only improve the interpretability of the model and  
116 make it easier for physicians to understand the model's decision-making but also inform  
117 doctors where to focus and then guide them when deciding on the most suitable targeted  
118 examinations and prevention strategies. An ideal risk model should therefore not only  
119 stratify high-risk groups but also focus the doctors attention to changing areas in the breast  
120 earlier.

121 We propose the Multi-Time-Points Breast Cancer Risk model (MTP-BCR), an end-to-end  
122 model that estimates the long-term future BC risk based on changes in breast tissue. Our  
123 contributions are as follows. First, our model leverages historical and current exams from  
124 a large in-house clinical mammogram dataset and obtains remarkable performance  
125 compared to other SOTA methods on patient-level BC risk prediction. Second, we explore  
126 and show that our image-based DL risk model outperforms clinical traditional BCSC risk  
127 models for long-term 10-year risk prediction. Third, we explore the unilateral breast level  
128 BC risk prediction and achieve similar performance to our risk models at the patient level.  
129 Fourth, we highlight suspicious areas in a longitudinal test dataset using the model's  
130 heatmaps, which may illustrate the attention consistency of our model and improve its  
131 interpretability. Fifth, to demonstrate the robustness of our method in clinical settings, we  
132 perform a systematic subgroup analysis. The results imply that our model may improve  
133 upon traditional and other image-based DL risk models.

## 134 Results

### 135 Overview of algorithm

136 For investigating our hypothesis that the breast tissue changes can help in learning the  
137 tumor (including both invasive and ductal carcinoma in situ) development pattern better,

138 multiple time points of examinations from the longitudinal screening mammograms are  
139 required. Like radiologists, who typically identify developing abnormalities by looking at  
140 changes in longitudinal exams, we propose a novel end-to-end multi-time point network,  
141 MTP-BCR, shown in Fig. 1A, leveraging longitudinal mammograms and medical records  
142 to capture the features related to increased BC risk. We aim to predict the risks on a  
143 patient-based level as well as for a single breast. Briefly, the proposed risk model first  
144 utilizes the multi-level (breast and patient level risk) and multi-task learning to extract  
145 static risk features from a single time point exam and prior medical records. Then the  
146 features of five historic exams, obtained before the current exam are selected (to mimic  
147 the practical use scenario) for learning the dynamic risk features using a multi-time point  
148 fusion model. This is combined with the risk factors of patients for predicting the future  
149 risk. It means that our end-to-end model uses current and historic screening  
150 mammography exams and existing medical records and then predicts the future 10-year  
151 BC risk. Architectural details, contents of the medical records, and risk factors are  
152 presented in the method part.

153 Risk calculation can be treated as a multi-class classification problem (16, 19), which is  
154 common in breast imaging, such as the classification of breast density (31), the Breast  
155 Imaging Reporting and Data System (BI-RADS (32)) score (33), the type of malignancy  
156 (3), and the BC molecular subtype (34). As shown in Fig. 1B, the risk of a patient getting  
157 BC within 5 or 10 years from the available data can be calculated as the cumulative sum  
158 of the probability from the first year up to the fifth or tenth year. Importantly, the  
159 prediction results of our model can guarantee that the risk is monotonically increasing and  
160 self-consistent. This avoids the situation, that can occur with separately trained models,  
161 where long-term risk may be lower than short-term risk. Moreover, this formulation also  
162 learns the inherent relationship between risks at different time points. In this study, the  
163 model is trained to predict the risk of BC at each of the 15 years and is validated by  
164 predicting BC within ten years. Therefore, our model can be easily extended for a longer  
165 than 15-year risk prediction when collecting enough longer-term follow-up data.

### 166 **Screening cohorts for risk modeling & compared candidates**

167 Fig. 1 shows the flowchart of the Screening Cohort selection in the inhouse dataset. The  
168 dataset contains 42,792 exams of 9,133 patients, split into 32,049 exams / 6,858 patients,  
169 4,432 exams / 919 patients, and 6,311 exams / 1,356 for the train set, validation set, and  
170 test set, respectively. The proposed model aims to handle multiple tasks, including cancer  
171 detection and future risk prediction. This would facilitate implementation in an actual  
172 clinical BC screening program, where not only focusing on the stratification of the high-  
173 risk population, short-term risk and determining whether women should be recalled is also  
174 essential. In fact, detection of existing malignancies, can be considered as an extremely  
175 short-term BC risk (35). Moreover, some of the model characteristics for the tasks of  
176 cancer detection and future risk prediction can be complementary (19).

177 To evaluate the model's capability of longer term BC risk prediction, we use two standard  
178 screening test sets following the protocols of (25) and (19). The first one is named as the  
179 biopsy-negative screening group (5,937 exams / 1,236 patients), which includes  
180 mammography exams with BI-RADS 1 and 2 scores, or other BI-RADS scores but with  
181 benign biopsy results within 90 days from the screening date. The second test set is called  
182 the normal BI-RADS screening group (5,139 exams / 1,157 patients), which only consists  
183 of the exams scored as BI-RADS 0, 1 and 2. It aims to explore how the model performs on  
184 high-risk population stratification when radiologists deem the exams not suspicious.

185 The inhouse mammogram dataset is coupled to patient derived classical risk factors that  
186 can be used in the clinical Breast Cancer Surveillance Consortium version 2 (BCSC,  
187 <https://tools.bcscc.org/BC5yearRisk/>). The distribution of clinical risk factors is shown  
188 in Supplemental Table S1. The BCSC model can estimate five-year, and ten-year BC risk  
189 based on risk factors but requires excluding patients following exclusion criteria (previous  
190 diagnosis of BC, younger than age 35 or older than age 74, or missing density estimates).  
191 Although studies have shown that image-based DL risk models outperform traditional risk  
192 models in 5-year risk assessments (19, 24, 25), the potential advantages of the former still  
193 need to be explored in longer-term 10-year risk assessments. Thus, we compare our model  
194 with not only the traditional BCSC 1-year and 5-year risk models but also with the BCSC  
195 predicted 10-year risk. To demonstrate the added value of the inclusion of patient based  
196 risk factors, we also build a similar multi-time point model without risk factors as MTP-  
197 BCR for comparison.

198 To demonstrate the risk prediction capacity, we compare it to the SOTA MIRAI  
199 (Massachusetts Institute of Technology, Boston, Massachusetts) model (19). MIRAI is a  
200 mammogram-based risk model that can predict 5-year risk at multiple time points and  
201 outperforms traditional models. Moreover, this model includes a pretrained risk factor  
202 predictor that allows missing risk factors. In this study, we also explore MIRAI's ability of  
203 the longer-term 10-year risk estimate. We obtain the pretrained MIRAI model from their  
204 public GitHub (<https://github.com/yala/Mirai>). For a competitive comparison, we finetune  
205 the MIRAI model on the inhouse training dataset to alleviate the impact of domain shift.  
206 We conduct hyperparameter search to finetune MIRAI and select the model with the best  
207 concordance index (C-index) on the validate set. Similar to the research (19), to  
208 investigate the performance of our method on BC detection, we also compare our model  
209 with the retrospective radiologist BI-RADS scores and the Globally Aware Multiple  
210 Instance (GMIC, New York University, New York) model (29). The GMIC is another  
211 recent SOTA DL model which focuses on detecting BC within three months, and some  
212 researches also show its potential for BC risk prediction (19,25). The pretrained GMIC  
213 model is obtained from the public GitHub repository  
214 (<https://www.github.com/nyukat/gmic>). For fairness, we re-implement the preprocessing  
215 from the raw DICOM format mammograms through their preset preprocessing pipeline  
216 and collect the ensembled predictions from the five pretrained models.

217 Note that, for full leverage of the mammogram examinations, we include all exams with at  
218 least one-year screening follow-up. To fairly compare five-year risk prediction with other  
219 SOTA methods and prove the contribution of our algorithm design of longitudinal input  
220 and multi-task learning, we also re-form the inhouse five-year risk dataset by excluding  
221 the examinations without at least five-year screening follow-up. Then we train our model  
222 from scratch on five-year risk prediction using the inhouse five-year risk dataset and we  
223 reperform all experiments (shown in the Supplemental Section).

### 224 **Risk prediction on full inhouse test dataset**

225 All concordance index (C-index) and Area Under the Receiver Operating Characteristics  
226 (AUC) results on the inhouse test dataset (6,311 examinations / 869 positives within 5  
227 years / 1,132 positives within 10 years) are summarized in Table 2.

228 ***Our method's performance:*** The performances of the MTP-BCR model with risk factors  
229 and without risk factors at patient level risk prediction (as shown in Table 2, and ROCs are  
230 shown in Fig. S3) obtained 10-year C-indices of 0.82 (95% CI, 0.81-0.84) and 0.77 (95%

231 CI, 0.75-0.78), with AUCs of 0.91 (95% CI, 0.89-0.92) and 0.87 (95% CI, 0.85-0.89) at  
232 easiest 1-year risk prediction and AUCs at the most difficult 10-year risk prediction of  
233 0.80 (95% CI, 0.78-0.82) and 0.77 (95% CI, 0.75-0.79), respectively. The AUCs results of  
234 1- to 10-year risk prediction show that the performances of the MTP-BCR with risk  
235 factors are significantly higher than those of MTP-BCR without risk factors (All  $P$  values  
236  $< 0.05$ ). We also evaluate the unilateral breast level cancer prediction of MTP-BCR  
237 models both with risk factors and without risk factors, as shown in Fig. S3. Similar  
238 performances of patient-level risk prediction are obtained, with the 10-year C-indices of  
239 0.81 (95% CI, 0.79-0.82) and 0.76 (95% CI, 0.75-0.78) for our methods with and without  
240 risk factors, and 5-year C-indices of 0.82 (95% CI, 0.81-0.84) and 0.78 (95% CI, 0.76-  
241 0.80). The AUCs of unilateral breast-level cancer prediction without risk factors ranged  
242 from 0.76 to 0.87. When incorporating patient derived risk factors, the AUCs ranged from  
243 0.77 to 0.89. Therefore, our MTP-BCR risk model can also accurately predict the risk of  
244 development of BC in a unilateral breast, and using risk factor information can further  
245 improve the performance of 1- to 10-year risk.

246 Moreover, we perform two ablation studies to choose the best design of the MTP-BCR  
247 model (Table S4 and S5). The first one is to investigate whether our multi-task and multi-  
248 level, and multi-time point learning strategies can improve the ability to extract risk-  
249 related features. The C-indices and AUCs show that the model with multi-task, multi-  
250 level, and multi-time-point learning is better than others alone. Using risk factors can  
251 further improve the performance of the risk models. Besides, the model achieves the best  
252 performance when using five time-point historic mammogram references.

253 **Comparing with other methods (except BCSC):** The 1-year AUCs of Radiologists BI-  
254 RADS assessments and the BC detection method GMIC are 0.83 (95% CI, 0.81-0.85) and  
255 0.74 (95% CI, 0.72-0.77) respectively, which are significantly lower than both MTP-BCR  
256 risk models ( $P < 0.001$ ). Therefore our MTP-BCR risk model outperforms radiologists  
257 and the SOTA BC detection model for BC detection and extremely short-term risk  
258 prediction, even when only using mammograms. Comparing to the SOTA DL-based  
259 MIRAI model, the 5-year C-indices of the MTP-BCR models (with/without risk factor)  
260 are 0.82 (95% CI, 0.81-0.84) and 0.77 (95% CI, 0.75-0.78) versus 0.73 (95% CI, 0.72-  
261 0.75). The AUC results show that both the MTP-BCR models significantly outperform the  
262 MIRAI model at all time points from 1-year to 5-year risk (All  $P$  values  $< 0.01$ ). Also for  
263 10-year risk prediction, the MTP-BCR methods still have a significant advantage (All  $P$   
264 values  $< 0.05$ ).

265 **Comparing with BCSC risk model:** Note that our study also include patients who are not  
266 eligible for risk calculation by the BCSC model as they are either out of the required age  
267 range of 35-74 or had a prior BC history. For this comparison, we conduct the experiments  
268 excluding the women that did not have scores from the BCSC model (Table S1). The  
269 AUC curves of all methods are shown in Fig. 3A. The AUC results show that both the  
270 MTP-BCR models significantly outperform the 1-year, 5-year, and 10-year BCSC risk  
271 models (All  $P$  values  $< 0.001$ ). The latter obtains AUCs of 0.62 (95% CI, 0.58-0.64), 0.65  
272 (95% CI, 0.62-0.68), and 0.71 (95% CI, 0.68-0.74), respectively. The 5-year and 10-year  
273 C-indices of BCSC models are 0.63 (95% CI, 0.61-0.65) and 0.64 (95% CI, 0.61-0.66),  
274 compared to C-indices of 0.91 (95% CI, 0.90-0.92) and 0.90 (95% CI, 0.88-0.91) by our  
275 MTP-BCR risk model with risk factors. Moreover, we also compare our risk models with  
276 the other methods in this specific population. The AUC results show that both the MTP-

277 BCR models significantly outperform all other models for 1-year to 10-year risk  
278 prediction (All  $P$  values  $< 0.001$ ).

279 **Performing experiments of 5-year risk prediction:** Similar results are obtained for  
280 re-performed experiments on the formed 5-year risk prediction dataset (Table S6 and S7).  
281 Both the MTP-BCR models with and without risk factors are significantly better than  
282 other methods. Moreover, we also perform two same ablation studies on the inhouse 5-  
283 year risk dataset (Table S12 and S13). Similar results to those of 10-year risk ablation  
284 experiments also demonstrate the stability of our learning strategy.

### 285 **Risk prediction in a healthy screening population**

286 **In biopsy negative screening population:** we evaluate all methods using the inhouse  
287 negative biopsy screening test set including 5,937 examinations / 495 positives within 5  
288 years / 758 positives within 10 years, as shown in Table 3. In this test set, results show that  
289 our MTP-BCR with risk factors holds superiority in C-index and AUC metrics. Extremely  
290 short-term (1 year) risk prediction can be equivalent to interval cancer detection. In this  
291 task, the AUC of our model without risk factors is 0.70 (95% CI, 0.65-0.74). The AUC  
292 increases to 0.77 (95% CI, 0.73-0.81) when using risk factors, significantly higher than  
293 that from BI-RADS scores with 0.61 (95% CI, 0.57-0.65), the BC detection method  
294 GMIC with 0.59 (95% CI, 0.54-0.65), and also the finetuned MIRAI with 0.65 (95% CI,  
295 0.60-0.70). In Fig. 3B and Table S2, the clinical BCSC 1-year risk model obtains an AUC  
296 of 0.70 (95% CI, 0.63-0.76), which is significantly lower than the AUCs of our MTP-BCR  
297 models (with risk factor: 0.87 / without risk factor: 0.82). For the long-term 5-year risk  
298 prediction, our model reaches a C-index of 0.65 (95% CI, 0.63-0.68) without risk factors  
299 and a C-index of 0.74 (95% CI, 0.72-0.76) with risk factors, versus 0.64 (95% CI, 0.62-  
300 0.66) for the finetuned MIRAI model (Table 3). When comparing with the clinical BCSC  
301 5-year risk model (as shown in Table S1), our MTP-BCR obtains a C-index of 0.79 (95%  
302 CI, 0.76-0.82) versus 0.69 (95% CI, 0.65-0.72). For the longer-term 10-year risk estimate,  
303 our only image based MTP-BCR model has a similar performance to 10-year risk BCSC  
304 model according by the 10-year C-index. But the results indicate that the MTP-BCR with  
305 risk factors model still significantly outperforms all other models by AUCs at each time  
306 point (All  $P$  values  $< 0.05$ ).

307 **In normal BI-RADS screening population:** In the normal BI-RADS screening test set  
308 with 5,139 examinations / 404 positives within 5 years / 612 positives within 10 years, we  
309 investigate the potential of risk models when radiologists cannot find any suspicious  
310 findings on the mammograms. Thus, the C-indices and AUCs of the BI-RADS are close to  
311 0.5, as shown in Table 3 and Table S2. Our MTP-BCR with risk factors is still  
312 significantly better than all other methods among the extremely short-term with a 1-year  
313 AUC of 0.74 (95% CI, 0.69-0.79), long-term with a 5-year AUC of 0.72 (95% CI, 0.70-  
314 0.75), and longer-term with 10-year AUC of 0.73 (95% CI, 0.71-0.76) risk predictions.  
315 Especially in the BCSC model target population (aged 35-74, without prior BC history),  
316 the 1-year AUC of our MTP-BCR risk-based model reaches 0.85 (95% CI, 0.78-0.91)  
317 while the radiologists and the cancer detection-based models fail to outperform random  
318 guessing.

319 Consistent with the findings on the full inhouse test set, AUC and C-index metrics show  
320 that our MTP-BCR model performs similarly for unilateral BC risk prediction and patient-  
321 level cancer risk prediction on both screening sets. We note that using the full training  
322 dataset to finetune MIRAI lead to poor performance of MIRAI on these two screening sets

(shown in Table S8 and S9, Replicate 5-Year BC Risk Prediction). Thus, we clean the training and validation sets using the same settings as for the two screening sets, and then re-finetune the MIRAI model and test it on the corresponding test set. Despite that, we find that the finetuned MIRAI model on the dataset with missing screening follow-up seems to be difficult. Specifically, the performances of the finetuned MIRAI from 3- to 10-year BC risk prediction become worse (shown in Fig. 3 B and C). Thus, for a meaningful comparison, it is necessary to re-implement these comparison experiments on the two recollected five-year screening datasets which cleaned exams with missing follow-up labels. As shown in Table S8 and S9, the AUCs and C-indices of MIRAI, after finetuning, reaches its own optimal, and outperforms the 5-year BCSC model. The finetuned MIRAI only achieves similar performance to our image-only MTP-BCR model from 3- to 5-year risk at both screening test sets (when only for women who can be scored by the BCSC model) (Table S9). Yet our method with risk factors still surpasses the MIRAI.

### **The ability of short and long future BC risk assessment**

While the above results demonstrate the advantages of our methods in risk prediction, the ability to predict real long-term future BC risk after eliminating the biases of cancer detection and short-term to 5-year risk prediction from current mammograms requires further exploration. Thus, we compare the models' performance in 5-year and 10-year risk prediction in the different subgroups of the full inhouse test sets by excluding exams from women diagnosed with cancer within less than 1, 3, and 5 years. These results, as shown in Table 4, demonstrate that our methods could not only detect BC and improve the performance of 5-year risk prediction compared with other SOTA methods but also learn the features related to the real longer-term (10 years) risk. The results of replicate 5-year BC risk prediction are shown in Table S10.

### **Clinical sub-group analysis**

To distinguish how our MTP-BCR model performs in different populations and to determine the potential population that can benefit most from it, we evaluate our risk model in different clinical subgroup, based on age, breast density, personal history, and future cancer sub-types (Fig. 4). We find that the MTP-BCR model performed similarly across different density groups and independent from future cancer sub-types. The C-indices for the MTP-BCR model for women aged <40, 40-60, and 60-80 are 0.87 (95% CI, 0.84-0.90), 0.81 (95% CI, 0.79-0.83) and 0.82 (95% CI, 0.79-0.84), respectively, which implies that our risk model performs better in younger cohorts. We also note that the risk model performs best in the female population without any prior personal BC history with C-index of 0.86 (95% CI, 0.84-0.87), compared to 0.76 (95% CI, 0.74-0.78), for women with a personal history of breast cancer. We also compare the C-index of 10-year risk prediction of different methods in different sub-groups, which are available in Table S3. Our results are further supported by the consistent performance from additional subgroup analyses in recollected 5-year risk dataset (Tables S11, supplemental). Due to a lack of race labels, the group analysis for different race groups is not performed.

### **Consistency of model attention in longitudinal images**

To investigate how risk-related areas evolve on multiple-time mammograms that our MTP-BCR model focused on, we utilize the gradient-weighted class activation maps (Grad-CAM) (36). Fig. 5 shows a visualization example of a BC patient. The heatmaps highlight potentially related regions where our proposed MTP-BCR model identifies predictive imaging features for BC risk. While this visualization is a preliminary process,



370 results show that the high-risk regions from multiple time point examinations that our  
371 model focuses on are relatively consistent. Moreover, the heatmaps show that our risk  
372 model could accurately figure out high-risk areas of short-term BC at both the  
373 craniocaudal (CC) and the mediolateral oblique (MLO) views of mammograms. The  
374 similar result is observed from the heatmaps of the retrained model on the inhouse five-  
375 year risk dataset (Fig. S5, supplemental).

## 376 Discussion

377 In this study, we develop a multi-time-point examination-based risk model, MTP-BCR, to  
378 assess 10-year breast cancer risk on patient and unilateral breast level using longitudinal  
379 screening mammograms and medical records. From extremely short-term risk (1-year, BC  
380 detection) to long-term (10-year) risk prediction, MTP-BCR outperforms radiologists' BI-  
381 RADS assessment, a SOTA BC detection method (GMIC), an extensively clinically  
382 validated single time point-based 5-year risk DL approach (MIRAI), and a traditional  
383 clinical risk model (BCSC). Apart from the patient level risk, our method could also  
384 estimate the risk base on unilateral breast level with comparable ability. Experiments on  
385 different screening subcohorts suggest that the longitudinal assessment of MTP-BCR is  
386 able to accurately identify longer-term, future risk-related features on mammograms,  
387 which is further supported by consistent heatmaps of multi-time point mammograms.  
388 Final sub-group analysis indicates that the proposed method performs consistently across  
389 subgroups of different breast densities and for future types of BC.

390 The motivation to develop BC risk models is for guiding personalized screening or  
391 triggering prevention regimens. The idea is to determine the screening frequency and the  
392 appropriate screening modality based on the individual risk of women, potentially also to  
393 recommend preventive therapy for women at a high-risk of developing breast cancer (13).  
394 Based on of risk factors such as age, genetic determinants, family history, previous benign  
395 biopsies, and recently considered image-based breast density, traditional risk models are  
396 used to globally assess 5-year, 10-year, or lifetime risk for large groups of women (37).  
397 However, our results show that density alone is not sufficient to represent all of the risk-  
398 related information within the mammograms. Moreover, ignoring the short-term risk of  
399 BC limits the value of these models in early BC detection. Recent DL-based risk models  
400 may fully utilize screening images but mainly target short-term risk prediction or interval  
401 cancer detection while ignoring long-term risk, which limits the ability to offer  
402 personalized screening recommendations and preventive interventions. In contrast our  
403 MTP-BCR risk model combines the advantages of both short- and long-term risk  
404 prediction strategies.

405 For short-term risk estimation, our risk model outperforms radiologists' BI-RADS and  
406 other recent DL methods. The results on the full test set demonstrate that our MTP-BCR  
407 risk model is more competitive than other risk models in indicating current or future BC  
408 risk in a realistic complex clinical screening setting independent of radiological  
409 interpretation. Other methods, especially traditional risk tools, can only work with modest  
410 performance to estimate women's future risk on the premise that the physician confirm  
411 that there is no existing cancer. Furthermore, in the normal BI-RADS screening group, our  
412 risk model has the highest AUC of 0.74 for the 1-year risk prediction, which can be  
413 regarded as an aid for radiologists to improve interval cancer detection in the whole  
414 screening population, including primary and recurring cancers. When detecting the  
415 primary interval cancers of the population that the BCSC model targets, our risk model  
416 reaches an AUC of 0.87. Aiming to facilitate radiologists' understanding of the model

417 decision-making, our risk model could also estimate the unilateral-breast level risk with  
418 similar performance to the patient-level risk prediction. Thus, our retrospective analysis  
419 and visualizations indicate that the MTP-BCR risk model could improve early detection  
420 and reduce interval cancer by guiding radiologists to identify high-risk regions on images.

421 For 5-year risk prediction, our methods surpass the SOTA MIRAI risk method across all  
422 screening cohorts or subcohorts. Although the MIRAI model does not need to have the  
423 risk factors as inputs and performs similarly to our image-only MTP-BCR model at 5-year  
424 risk ( $P > 0.05$ ) on the biopsy negative screening set and normal BI-RADS set, we note that  
425 the MIRAI model involves a pretrained risk factors predictor enabling it to benefit from  
426 the missing risk factors that reaches a similar performance of 5-year risk prediction as  
427 MIRAI with risk factors ( $P = 0.27$ ) (19). While our MTP-BCR model with risk factors is  
428 significantly better than all others (All  $P$  values  $< 0.05$ ). Besides, the MIRAI is already  
429 trained on their large private MGH dataset. The training set includes 210,819 exams is 6.5  
430 times larger than our Inhouse training set. Then we still fully finetuned the MIRAI with its  
431 weight in our In-house training set without freezing the encoder. On the other hand, our  
432 MTP-BCR model is only trained on the In-house dataset directly. As for long-term risk,  
433 the MTP-BCR risk model is more accurate than the BCSC 10-year risk model, which  
434 suggests our risk model has the potential for better decisions regarding a risk-adapted  
435 screening regimen and preventive therapy. At breast level, risk could be the foundation of  
436 more refined screening and prevention strategies. It should be underlined that in this study  
437 we also involve patients with prior BC history, which are not included in most of the risk  
438 models. Our risk model is, in fact, also designed to leverage the history information of  
439 prior-tumor and therapy, which the recurrence risk models use (38), for recurrence cancer  
440 risk prediction.

441 The promising performance of MTP-BCR can be attributed to its capacity to capture  
442 unique BC risk-related characteristics. The multi-task learning strategy helps the model to  
443 fully extract risk-related features from images and also improves the generalization of the  
444 DL model (39). The multi-level learning strategy enables our model to learn the  
445 relationship between local (unilateral breast) level risk and global (patient) level risk while  
446 keeping the local information as much as possible when combining the local features for  
447 the summary of the global features. Thus, the MTP-BCR risk model can consistently focus  
448 on similar regions on longitudinal mammograms without registration. For accurate longer-  
449 term BC risk prediction, we need not only the static risk-related features from the single  
450 time point exam but also the dynamic features from the multi-time point exams to indicate  
451 the development risk of BC. Recently, a study (20) also explored the potential of using  
452 longitudinal mammogram examinations to improve short-term risk prediction. But we  
453 note that it has been restricted to a small image-only dataset and a setting of a fixed  
454 number of input time points, which hinders its clinical application. On the contrary, our  
455 MTP-BCR model is built based on an extensive clinical screening mammogram dataset,  
456 enabling efficient use of risk factors, and has the flexibility to input 0-5 historical  
457 reference exams.

458 This research has limitations. Although we leverage the prior tumor information and  
459 therapy records (as explained in Section Methods) to improve our risk model's  
460 performance on BC recurrence risk, big gaps exist between the subgroups with/without  
461 prior BC. More efforts are needed to improve the performance of recurrence risk  
462 prediction. Further validation of our model is required before it can be broadly  
463 implemented in clinical practice. For instance, more detailed demographics (e.g., race) are

464 required to prove its generalizability. We note that the breast cancer incidence in our  
465 screening set is higher than that of the standard screening dataset. Therefore, in the future,  
466 we will also explore the clinical potential of our MTP-BCR model based on external  
467 standard screening mammography datasets from multiple hospitals. To validate the  
468 detection of extremely early signs of BC, a pixel-level annotated dataset is necessary.  
469 Moreover, a reader study for incorporation of the risk model in the radiologist workflow  
470 may also be a future direction for further demonstrating the benefits of risk models for  
471 personalization BC screening policy.

472 In conclusion, we propose a novel DL model using longitudinal mammogram  
473 examinations and history obtained from medical records that outperforms the SOTA  
474 MIRAI and traditional BCSC risk model by a large margin. The improvement is  
475 consistent across screening and future risk subgroups. These results support the hypothesis  
476 that longitudinal mammography contains informative spatiotemporal indicators of future  
477 breast risk that cannot be captured by the single-time point DL models. Multi-time point  
478 models based on longitudinal analysis strategies have the potential to replace single-time  
479 point based risk prediction models. Apart from increasing the accuracy for BC risk  
480 prediction, we also improve the interpretability of our risk model, which could potentially  
481 accelerate the translation of personalized AI-based risk stratification into routine BC  
482 screening policies.

## 483 **Materials and Methods**

### 484 **Data collection**

485 Our retrospective study was approved by the Institutional Review Board (IRB) of  
486 Netherlands Cancer Institute (NKI) with protocol numbers: IRBd21-060. A flowchart  
487 illustrating the construction of this large study dataset is shown in Fig. 2. We collect  
488 37,517 patients recorded in our hospital between January 1, 2004, and December 31,  
489 2020. Then we collect the longitudinal digital screening mammograms and exclude  
490 patients without at least one year of screening follow-up, in line with the research (19).  
491 Details about the distributions of the dataset are available in Fig. S1. Although part of the  
492 patients did not have 10-year screening follow-up, we also leverage their known outcomes  
493 and images to supervise the model. Therefore, we keep 9,133 patients consisting of 2,562  
494 BC patients who were biopsy-proven within 10 years and 6,571 at intermediate risk who  
495 had at least 10 years of screening follow-up and did not receive a cancer diagnosis. All  
496 patients are randomly divided into training, validation, and test sets with a ratio of  
497 7.5:1:1.5. The training, validation, and test sets include 6,858, 919, and 1,356 patients with  
498 32,049, 4,432, and 6,311 examinations, respectively.

500 BC-relevant risk factors are already showing an essential role in both traditional (12, 15)  
501 and image-based DL methods (16, 19). In our study, we collect the risk factors through  
502 electronic medical records from clinical radiology, tumor, therapy, and pathology reports  
503 from our hospital. The distribution of clinical risk factors in the inhouse dataset is shown  
504 in Table 1. Specifically, we obtain age, race, BI-RADS and breast density (ACR) grade,  
505 family history, genetic determinants, previous BC history, previous ovarian cancer history,  
506 self-reported menopausal status, and age of menarche. The BI-RADS and breast density  
507 (ACR) grade are estimated by radiologists during clinical interpretation. BI-RADS grades  
508 include additional imaging required (BI-RADS 0), normal (BI-RADS 1), benign (BI-  
509 RADS 2), probably benign (BI-RADS 3), suspicious for malignancy (BI-RADS 4), highly  
510 suggestive of malignancy (BI-RADS 5), and known biopsy-proven malignancy (BI-RADS

6). ACR class include mostly composed of fatty tissue (ACR 1), scattered fibroglandular tissue (ACR 2), heterogeneously dense (ACR 3), and extremely dense (ACR 4). Images with missing densities are interpolated by nearest neighbour interpolation with reference to the density estimates of screening images from adjacent years of the patient. Because the weights of patients are missing, we did not calculate the body mass index (BMI). In our study, we also include patients with prior BC. Thus, following the research of recurrence risk prediction (38), we also leverage the information of prior tumor, which include pathologic tumor (pT)-stage, pathologic node (pN)-stage, hormone receptor status (estrogen receptor (ER)- and progesterone receptor (PR)-status), anti-hormonal therapy, human epidermal growth factor receptor 2 (HER2-status), type of surgery, adjuvant chemotherapy, adjuvant radiation therapy, antibody therapy and Pathologic Complete Response (pCR).

### Problem formulation

For the risk prediction, we first divide the relevant time span into one-year time-slots and treat each slot as an independent class. To evaluate the overall risk of the first  $j$  years, the probabilities of each year are summed together from the first year up to the  $j_{th}$  year. The formulas are defined as follows Eq. 1:

$$Risk_j = \sum_{i=1}^j y_i = \sum_{i=1}^j Softmax(F(x))_i \quad (1)$$

where,  $y_i$  means the predicted probability of an exam getting BC diagnosis at  $i_{th}$  year, which is calculated by inputting a sequence of a mammograms and corrected risk factors  $m$  into the model  $F$  and using the *Softmax* function for the probability generalization. For example, as shown in Fig. 1B, to predict the *Risk* of a patient getting BC within  $j = 2$  years from the checked images, it can be calculated as the sum of the probability of the first year and second year.

### Architectural details

As shown in Fig. 1, the MTP-BCR model consists of the network weights shared **Image Encoder** ( $\varphi_{encoder}$ ) connected by **Side-Specific (Unilateral-based) Module** ( $\varphi_{unilateral}$ ), **Exam-based Module** ( $\varphi_{exam}$ ), and finally, **Multi-Time-Point fusion Module** ( $\varphi_{fusion}$ ) combines with the inputted risk factors of patients. Moreover, to improve risk modeling performance and generalization, we also introduce **multi-task learning**, which could benefit from learning the domain-specific features from multiple BC risk-related tasks (detailed below).

**Image Encoder:** We employ ImageNet pre-trained ResNet-18, excluding the last full connection (FC), as the encoder ( $\varphi_{encoder}$ ) to extract breast tissue features. The weights-shared encoders correspond to each image from a sequence of mammography exams. Each exam includes four images including craniocaudal (CC) view ( $v = cc$ ) and mediolateral oblique (MLO) view ( $v = mlo$ ) from the left( $l = left$ ) and right( $l = right$ ) side breast. Thus, shown in the Eq. 2, each input mammogram,  $x_{v,l}^t$ , from the 6 time point ( $t$ ) exams is represented as the high-dimensional locally feature vector  $\theta_{v,l}^t$  with the size of  $512 \times 1$  by the encoder separately.

$$\theta_{v,l}^t = \varphi_{encoder}(x_{v,l}^t), v \in \{cc, mlo\}, l \in \{right, left\}, t \in \{0, 1, 2, 3, 4, 5\} \quad (2)$$

**Side-Specific Prediction Module:** Ipsilateral CC and MLO views are different projection views of the same breast. Practically, they are combined to express the three-dimensional structure of the breast, which radiologists use to detect abnormalities. Moreover, most tumors only appear in one of the breasts (40). In order to train the model to learn the three-dimensional structure of the breast fully and correspond to the previous left and right breast-specific tumor information, we concatenate ( $\oplus$ ) the feature vectors of the ipsilateral view, combined with the side-specific prior tumor information ( $tumor_l^t$ ) and then place a Multi-layer Perceptron (MLP) for side-based multi-task learning. The MLP layer includes two FC layers with an input size of 1152 for the first FC layer and 512 output units each. A dropout layer with a rate of 0.5 between the two FC layers. Therefore, show in Eq. 3 features of the ipsilateral CC and MLO views and outputs a vector ( $\varepsilon_l^t$ ) with the size of  $512 \times 1$  representing the unilateral-based breast features.

$$\varepsilon_l^t = \varphi_{unilateral}(tumor_l^t \oplus \theta_{l,v=cc}^t \oplus \theta_{l,v=mlo}^t), l \in \{right, left\}, t \in \{0, 1, 2, 3, 4, 5\} \quad (3)$$

**Exam-Based Prediction Module:** For a similar purpose, we also need to combine the information of bilateral breasts to predict the patient level risk. As in Eq. 4, we concatenate the feature vectors from the output bilateral breasts and feed them to another MLP layer with the same structure for the exam-based multi-task learning. Also, a size of  $512 \times 1$  vector feature ( $\delta^t$ ), which combines the features from right and left breast, represents the global information of a four-view exam.

$$\delta^t = \varphi_{exam}(\varepsilon_{l=right}^t \oplus \varepsilon_{l=left}^t), t \in \{0, 1, 2, 3, 4, 5\} \quad (4)$$

**Multi-Time Point Fusion Model:** For learning the risk development pattern from the longitudinal screening mammograms, five historic exams before the current exam are randomly selected as the reference for the comparison by the multi-time point fusion model. The current exam refers to the target exam for which we access future BC risk. A sequence of mammography exams serve as references along with the time intervals ( $i_0, i_1, \dots, i_5$ ) to the current exam and are combined with the risk factors to predict the future likelihood of BC occurring after the current mammograms. Inspired by the research (26), we leverage a sequence/time-aware transformer learning (41) to capture features about the temporal relations between multiple mammograms, which aims to disentangle the risk-relevant changing patterns from the normal breast tissue changing patterns. For embedding the spatiotemporal relationships of past-current exams into the continuous latent space, we employ Continuous Position Embedding (CPE) method (26), which computes time continuous embedding  $e^t$  to condition the image features. Not that, to avoid ignoring local information of images during multi-time exam comparison, we combine both the local image features  $\theta_{v,l}^t$ , and global features  $\delta^t$ . For patients without five history records for references, we select all history records and then mute the missing data by filling 0. At the same time, for the purpose of data augmentation, we randomly drop a subset of exams in the reference sequence to improve model robustness and avoid overfitting. The fusion model also includes the patient risk factors ( $riskf$ ). Subsequently, a fused feature ( $\tau$ , a vector size of  $640 \times 1$ ) is obtained for the final multi-time fused-based multi-task learning, representing the patient's multi-time point screening information.

$$\tau = \varphi_{fusion}(riskf \oplus e^t \oplus \delta^t \oplus \theta_{l,v}^t) \quad (5)$$

### Multi-task classifier for side-based, exam-based, and multi-time fused prediction:

During the multi-task learning, we constrain the feature extractor for BC risk-related prediction task learning, shown in Fig. 1C. For instance, the predictions of breast-based BC risk, history, tumor location, and tumor sub-type are included for the side-based multi-task classifier. For the exam-based multi-task classifier, we replace the breast-based BC risk prediction and history prediction with exam-based prediction. We also add the prediction of age, BI-RADS, race, density, and manufacture. And for the final multi-time fused classifier, we mainly focus on unilateral specific BC risk. We calculate the Binary Cross Entropy (BCE) for risk prediction and Cross Entropy (CE) Loss for other predictions. For all three classifiers, we mainly focus on the task of risk prediction thus risk-specific tasks have 5 times higher weight than other tasks during the training. For total loss computing, Eq. 6, we also allocate weight  $w_{fusion} = 1$  to the final multi-time point fused classifier, 5 times higher than the other two classifiers ( $w_{side} = 0.2$ ,  $w_{exam} = 0.2$ ). We choose the weights of loss after the hyperparameter search.

$$L_{total} = L_{side} \times w_{side} + L_{exam} \times w_{exam} + L_{fusion} \times w_{fusion} \quad (6)$$

### Implementation details

We use ResNet-18 initializing with ImageNet pre-trained weights as the backbone of all our methods. All methods are implemented in PyTorch (version 1.12.1) with the same training strategies. We use the Adam (42) optimizer and a rate of 0.5 for dropout (43) after every fully connected layer. We train models for 20 epochs with a batch size of 8 and an initial learning rate of  $10^{-4}$ . The learning rate is decayed by a factor of 10 every five epochs. The best models of each method are chosen with the best AUC performance index on the validation set. The experiments are performed on a Quadro A6000 GPU (48GB). The source code is available at <https://github.com/Netherlands-Cancer-Institute/MTP-BCR>. Mammograms with standard DICOM format are pre-processed before being fed into the model. First, we convert the images into 16-bit PNG format and segment the whole breast region to exclude the background. Then, to unify the size of all images, we zero-pad and resize images to 512 by 1024 pixels while retaining the relative scale and aspect ratio. Finally, the image is normalized using the min-max method. We also employ standard data augmentation techniques (i.e., random flip, brightness, and contrast) during training for model robustness and overfitting prevention.

### Evaluation metrics and statistical analysis

In this study, the tasks of prediction of 1- to 10-year risk are categorical classification tasks, in which positive samples are the patients diagnosed with BC within 1 to 10 years while negative samples are women who stayed healthy for at least 1 to 10 year-screening follow-ups. The performances of the different methods are evaluated by the area under the receiver operating characteristic curve (AUC, calculated by scikit-learn, version: 1.1.2, <https://scikit-learn.org>). To generally evaluate AUCs across all times (from 1- to 10-year risk), the Uno's C-index (44) is calculated using scikit-survival (version 0.18.0, <https://scikit-survival.readthedocs.io/en/stable/>). The 95% confidence intervals (CI) of AUC and C-index matrices are estimated by bootstrapping with 1,000 bootstraps for each measure. Statistical significance among different methods is assessed using DeLong's test (45), with the significant level predefined as  $P < 0.05$ .

## References

1. B. O. Anderson, A. M. Ilbawi, E. Fidarova, E. Weiderpass, L. Stevens, M. Abdel-Wahab, B. Mikkelsen, The global breast cancer initiative: a strategic collaboration to strengthen health care for non-communicable diseases. *Lancet Oncol.* **22**, 578–581 (2021).
2. L. E. Pace, N. L. Keating, A systematic assessment of benefits and risks to guide breast cancer screening decisions. *JAMA* **311**, 1327–1335 (2014).
3. S. M. McKinney, M. Sieniek, V. Godbole, J. Godwin, N. Antropova, H. Ashrafian, T. Back, M. Chesus, G. S. Corrado, A. Darzi, M. Etemadi, F. Garcia-Vicente, F. J. Gilbert, M. Halling-Brown, D. Hassabis, S. Jansen, A. Karthikesalingam, C. J. Kelly, D. King, J. R. Ledsam, D. Melnick, H. Mostofi, L. Peng, J. J. Reicher, B. Romera-Paredes, R. Sidebottom, M. Suleyman, D. Tse, K. C. Young, J. D. Fauw, S. Shetty, International evaluation of an ai system for breast cancer screening. *Nature* **577**, 89–94 (2020).
4. M. G. Marmot, D. Altman, D. Cameron, J. Dewar, S. Thompson, M. Wilcox, The benefits and harms of breast cancer screening: an independent review. *Br. J. Cancer* **108**, 2205–2240 (2013).
5. K. J. Geras, R. M. Mann, L. Moy, Artificial intelligence for mammography and digital breast tomosynthesis: current concepts and future perspectives. *Radiology* **293**, 246 (2019).
6. B. Lauby-Secretan, C. Scoccianti, D. Loomis, L. Benbrahim-Tallaa, V. Bouvard, F. Bianchini, K. Straif, B. Breast-cancer screening—viewpoint of the iarc working group. *N. Engl. J. Med.* **372**, 2353–2358 (2015).
7. M. Eriksson, S. Destounis, K. Czene, A. Zeiberg, R. Day, E. F. Conant, K. Schilling, P. Hall, A risk model for digital breast tomosynthesis to predict breast cancer and guide clinical care. *Sci Transl Med* **14**, eabn3971 (2022).
8. A. Gastounioti, S. Desai, V. S. Ahluwalia, E. F. Conant, D. Kontos, Artificial intelligence in mammographic phenotyping of breast cancer risk: a narrative review. *Breast Cancer Res.* **24**, 1–12 (2022).
9. E. S. McDonald, A. S. Clark, J. Tchou, P. Zhang, G. M. Freedman, Clinical diagnosis and management of breast cancer. *J. Nucl. Med.* **57**, 9S–16S (2016).
10. N. Pashayan, A. C. Antoniou, U. Ivanus, L. J. Esserman, D. F. Easton, D. French, G. Sroczynski, P. Hall, J. Cuzick, D. G. Evans, J. Simard, M. Garcia-Closas, R. Schmutzler, O. Wegwarth, P. Pharoah, S. Moorthie, S. De Montgolfier, C. Baron, Z. Herceg, C. Turnbull, C. Balleyguier, P. G. Rossi, J. Wesseling, D. Ritchie, M. Tischkowitz, M. Broeders, D. Reisel, A. Metspalu, T. Callender, H. D. Koning, P. Devilee, S. Delalogue, M. K. Schmidt, M. Widschwendter, Personalized early detection and prevention of breast cancer: Envision consensus statement. *Nat. Rev. Clin. Oncol.* **17**, 687–705 (2020).
11. J. Tyrer, S. W. Duffy, J. Cuzick, A breast cancer prediction model incorporating familial and personal risk factors. *Stat Med* **23**, 1111–1130 (2004).
12. M. H. Gail, L. A. Brinton, D. P. Byar, D. K. Corle, S. B. Green, C. Schairer, J. J. Mulvihill, Projecting individualized probabilities of developing breast cancer for white females who are being examined annually. *J. Natl. Cancer Inst.* **81**, 1879–1886 (1989).
13. A. R. Brentnall, J. Cuzick, D. S. Buist, E. J. A. Bowles, Long-term accuracy of breast cancer risk assessment combining classic risk factors and breast density. *JAMA Oncol.* **4**, e180174–e180174 (2018).
14. T. Carver, S. Hartley, A. Lee, A. P. Cunningham, S. Archer, C. B. D. Villiers, J. Roberts, R. Ruston, F. M. Walter, M. Tischkowitz, D. F. Easton, A. C. Antoniou, Canrisk tool—a web interface for the prediction of breast and ovarian cancer risk and the likelihood of carrying genetic pathogenic variants. *Cancer Epidemiol. Biomarkers Prev.* **30**, 469–473 (2021).

- 690 15. J. A. Tice, S. R. Cummings, R. Smith-Bindman, L. Ichikawa, W. E. Barlow, K.  
691 Kerlikowske, Using clinical factors and mammographic breast density to estimate breast  
692 cancer risk: development and validation of a new predictive model. *Ann. Intern. Med.* **148**,  
693 337–347 (2008).
- 694 16. A. Yala, C. Lehman, T. Schuster, T. Portnoi, R. Barzilay, A deep learning mammography-  
695 based model for improved breast cancer risk prediction. *Radiology* **292**, 60–66 (2019).
- 696 17. K. Dembrower, Y. Liu, H. Azizpour, M. Eklund, K. Smith, P. Lindholm, F. Strand,  
697 Comparison of a deep learning risk score and standard mammographic density score for  
698 breast cancer risk prediction. *Radiology* **294**, 265–272 (2020).
- 699 18. M. Eriksson, K. Czene, F. Strand, S. Zackrisson, P. Lindholm, K. Lång, D. Förnvik, H.  
700 Sartor, N. Mavaddat, D. Easton, P. Hall, Identification of women at high risk of breast  
701 cancer who need supplemental screening. *Radiology* **297**, 327–333 (2020).
- 702 19. A. Yala, P. G. Mikhael, F. Strand, G. Lin, K. Smith, Y.-L. Wan, L. Lamb, K. Hughes, C.  
703 Lehman, R. Barzilay, Toward robust mammography-based models for breast cancer risk.  
704 *Sci. Transl. Med.* **13**, eaba4373 (2021).
- 705 20. S. Dadsetan, D. Arefan, W. A. Berg, M. L. Zuley, J. H. Sumkin, S. Wu, Deep learning of  
706 longitudinal mammogram examinations for breast cancer risk prediction. *Pattern*  
707 *Recognit.* p. 108919 (2022).
- 708 21. A. Yala, P. G. Mikhael, C. Lehman, G. Lin, F. Strand, Y.-L. Wan, K. Hughes, S. Satuluru,  
709 T. Kim, I. Banerjee, J. Gichoya, H. Trivedi, R. Barzilay, Optimizing risk-based breast  
710 cancer screening policies with reinforcement learning. *Nat. Med.* **28**, 136–143 (2022).
- 711 22. A. J. T. Wanders, W. Mees, P. A.M. Bun, N. Janssen, A. Rodríguez-Ruiz, M. U. Dalmış,  
712 N. Karssemeijer, C. H. van Gils, I. Sechopoulos, R. M. Mann, C. J. V. Rooden, Interval  
713 cancer detection using a neural network and breast density in women with negative  
714 screening mammograms. *Radiology* **303**, 269–275 (2022).
- 715 23. A. Yala, P. G. Mikhael, F. Strand, G. Lin, S. Satuluru, T. Kim, I. Banerjee, J. Gichoya, H.  
716 Trivedi, C. D. Lehman, K. Hughes, D. J. Sheedy, L. M. Matthis, B. Karunakaran, K. E.  
717 Hegarty, S. Sabino, T. B. Silva, M. C. Evangelista, R. F. Caron, B. Souza, E. C. Mauad, T.  
718 Patalon, S. Handelman-Gotlib, M. Guindy, R. Barzilay, Multi-institutional validation of a  
719 mammography-based breast cancer risk model. *J. Clin. Oncol.* pp. JCO–21 (2021).
- 720 24. C. D. Lehman, S. Mercaldo, L. R. Lamb, T. A. King, L. W. Ellisen, M. Specht, R. M.  
721 Tamimi, Deep learning vs traditional breast cancer risk models to support risk-based  
722 mammography screening. *J. Natl. Cancer Inst.* **114**, 1355–1363 (2022).
- 723 25. V. A. Arasu, L. A. Habel, N. S. Achacoso, D. S. Buist, J. B. Cord, L. J. Esserman, N. M.  
724 Hylton, M. M. Glymour, J. Kornak, L. H. Kushi, D. A. Lewis, V. X. Liu, D. L.  
725 Miglioretti, D. A. Navarro, W. Sieh, L. Shen, O. Sofrygin, H.-C. Yoon, C. Lee,  
726 Comparison of mammography artificial intelligence algorithms for 5-year breast cancer  
727 risk prediction. *medRxiv* pp. 2022–01 (2022).
- 728 26. A. Sriram, Muckley, K. Sinha, F. Shamout, J. Pineau, K. J. Geras, L. Azour, Y.  
729 Aphinyanaphongs, N. Yakubova, W. Moore, Covid-19 prognosis via self-supervised  
730 representation learning and multi-image prediction. *arXiv preprint arXiv:2101.04909*  
731 (2021).
- 732 27. M. Eriksson, K. Czene, C. Vachon, E. F. Conant, P. Hall, Long-term performance of an  
733 image-based short-term risk model for breast cancer. *J. Clin. Oncol.* pp. JCO–22 (2023).
- 734 28. Liu, F. Zhang, C. Chen, S. Wang, Y. Wang, Y. Yu, Act like a radiologist: Towards  
735 reliable multi-view correspondence reasoning for mammogram mass detection. *IEEE*  
736 *Trans. Pattern Anal. Mach. Intell.* **44**, 5947–5961 (2021).
- 737 29. Y. Shen, N. Wu, J. Phang, J. Park, K. Liu, S. Tyagi, L. Heacock, S. G. Kim, L. Moy, K.  
738 Cho, K. J. Geras, An interpretable classifier for high-resolution breast cancer screening  
739 images utilizing weakly supervised localization. *Med Image Anal.* **68**, 101908 (2021).



- 740 30. A. J. Barnett, F. R. Schwartz, C. Tao, C. Chen, Y. Ren, J. Y. Lo, C. Rudin, A case-based  
741 interpretable deep learning model for classification of mass lesions in digital  
742 mammography. *Nat. Mach. Intell.* **3**, 1061–1070 (2021).
- 743 31. C. D. Lehman, A. Yala, T. Schuster, B. Dontchos, M. Bahl, K. Swanson, R. Barzilay,  
744 Mammographic breast density assessment using deep learning: clinical implementation.  
745 *Radiology* **290**, 52–58 (2019).
- 746 32. D. A. Spak, J. Plaxco, L. Santiago, M. Dryden, B. Dogan, Bi-rads® fifth edition: A  
747 summary of changes. *Diagn. Interv. Imaging* **98**, 179–190 (2017).
- 748 33. S. M. Castro, E. Tseytlin, O. Medvedeva, K. Mitchell, S. Visweswaran, T. Bekhuis, R. S.  
749 Jacobson, Automated annotation and classification of bi-rads assessment from radiology  
750 reports. *J. Biomed. Inform.* **69**, 177–187 (2017).
- 751 34. W. Ma, Y. Zhao, Y. Ji, X. Guo, X. Jian, P. Liu, S. Wu, Breast cancer molecular subtype  
752 prediction by mammographic radiomic features, *Academic radiology* **26**, 196–201 (2019).
- 753 35. X. Qian, J. Pei, H. Zheng, X. Xie, L. Yan, H. Zhang, C. Han, X. Gao, H. Zhang, W.  
754 Zheng, Q. Sun, L. Lu, K. K. Shung, Prospective assessment of breast cancer risk from  
755 multimodal Multiview ultrasound images via clinically applicable deep learning. *Nat.*  
756 *Biomed. Eng.* **5**, 522–532 (2021).
- 757 36. R. R. Selvaraju, M. Cogswell, A. Das, R. Vedantam, D. Parikh, D. Batra, Grad-cam:  
758 Visual explanations from deep networks via gradient-based localization. *Proc. IEEE*  
759 *Comput. Soc. Conf. Comput. Vis. Pattern Recognit.* (2017), pp. 618–626.
- 760 37. J. Louro, M. Posso, M. Hilton Boon, M. Román, L. Domingo, X. Castells, M. Sala, A  
761 systematic review and quality assessment of individualised breast cancer risk prediction  
762 models. *Br. J. Cancer* **121**, 76–85 (2019).
- 763 38. V. Völkel, T. A. Hueting, T. Draeger, M. C. van Maaren, L. de Munck, L. J. Strobbe, G.  
764 S. Sonke, M. K. Schmidt, M. van Hezewijk, C. G. Groothuis-Oudshoorn, S. Siesling,  
765 Improved risk estimation of locoregional recurrence, secondary contralateral tumors and  
766 distant metastases in early breast cancer: the influence 2.0 model. *Breast Cancer Res.*  
767 *Treat.* **189**, 817–826 (2021).
- 768 39. Y. Zhang, Q. Yang, A survey on multi-task learning. *IEEE Trans Knowl Data Eng.* **34**,  
769 5586–5609 (2021).
- 770 40. C. Wang, J. Li, F. Zhang, X. Sun, H. Dong, Y. Yu, Y. Wang, Bilateral asymmetry guided  
771 counterfactual generating network for mammogram classification. *IEEE Trans Image*  
772 *Process* **30**, 7980–7994 (2021)
- 773 41. N. Parmar, A. Vaswani, J. Uszkoreit, L. Kaiser, N. Shazeer, A. Ku, D. Tran, Image  
774 transformer. *International conference on machine learning (PMLR, 2018)*, pp. 4055–  
775 4064.
- 776 42. D. P. Kingma, J. Ba, Adam: A method for stochastic optimization. *arXiv preprint*  
777 *arXiv:1412.6980* (2014).
- 778 43. G. E. Hinton, N. Srivastava, A. Krizhevsky, I. Sutskever, R. R. Salakhutdinov, Improving  
779 neural networks by preventing co-adaptation of feature detectors. *arXiv preprint*  
780 *arXiv:1207.0580* (2012).
- 781 44. H. Uno, T. Cai, M. J. Pencina, R. B. D’Agostino, L.-J. Wei, On the c-statistics for  
782 evaluating overall adequacy of risk prediction procedures with censored survival data.  
783 *Stat. Med.* **30**, 1105–1117 (2011).
- 784 45. X. Sun, W. Xu, Fast implementation of delong’s algorithm for comparing the areas under  
785 correlated receiver operating characteristic curves. *IEEE Signal Process. Lett.* **21**, 1389–  
786 1393 (2014).
- 787  
788  
789

790 **Acknowledgments**

791 The authors thank to the support from the Chinese Scholarship Council scholarship (CSC)  
792 (X.W., Y.G., and L.H.: 202107720016, 202006930001, and 202006240065) and  
793 Guangzhou Elite Project (T.Z.: TZ–JY201948).

794  
795 **Author contributions:** Conceptualization: X.W., T.T., and R.M. Data Collection: X.W.,  
796 T.Z., L.H., and Y.G. Methodology: X.W., T.T., Y.G., R.M, and R.S. Investigation: X.W.,  
797 Y.G., and A.D.A. Visualization: X.W., Y.G., and R.S. Supervision: T.T., R.M., and  
798 R.B.T. Writing—original draft: X.W., Y.G., R.S., T.Z., and L.H. Writing—review &  
799 editing: R.M., N.K., X.W., C.A.D., M.K.S., and J.T.

800  
801 **Competing interests:** Authors declare that they have no competing interests.  
802  
803

804 **Data and materials availability:** All custom codes related to training and developing the deep  
805 learning models is available on [https://github.com/Netherlands-Cancer-Institute/MTP-](https://github.com/Netherlands-Cancer-Institute/MTP-BCR)  
806 [BCR](https://github.com/Netherlands-Cancer-Institute/MTP-BCR). The trained MTP-BCR model is available after the publication of this paper. The  
807 inhouse datasets are used under license to the respective hospital system for the current  
808 study and are not publicly available. All data associated with this study are present in the  
809 paper or the Supplementary Materials.  
810  
811

812 **Figures and Tables**

813  
814  
815

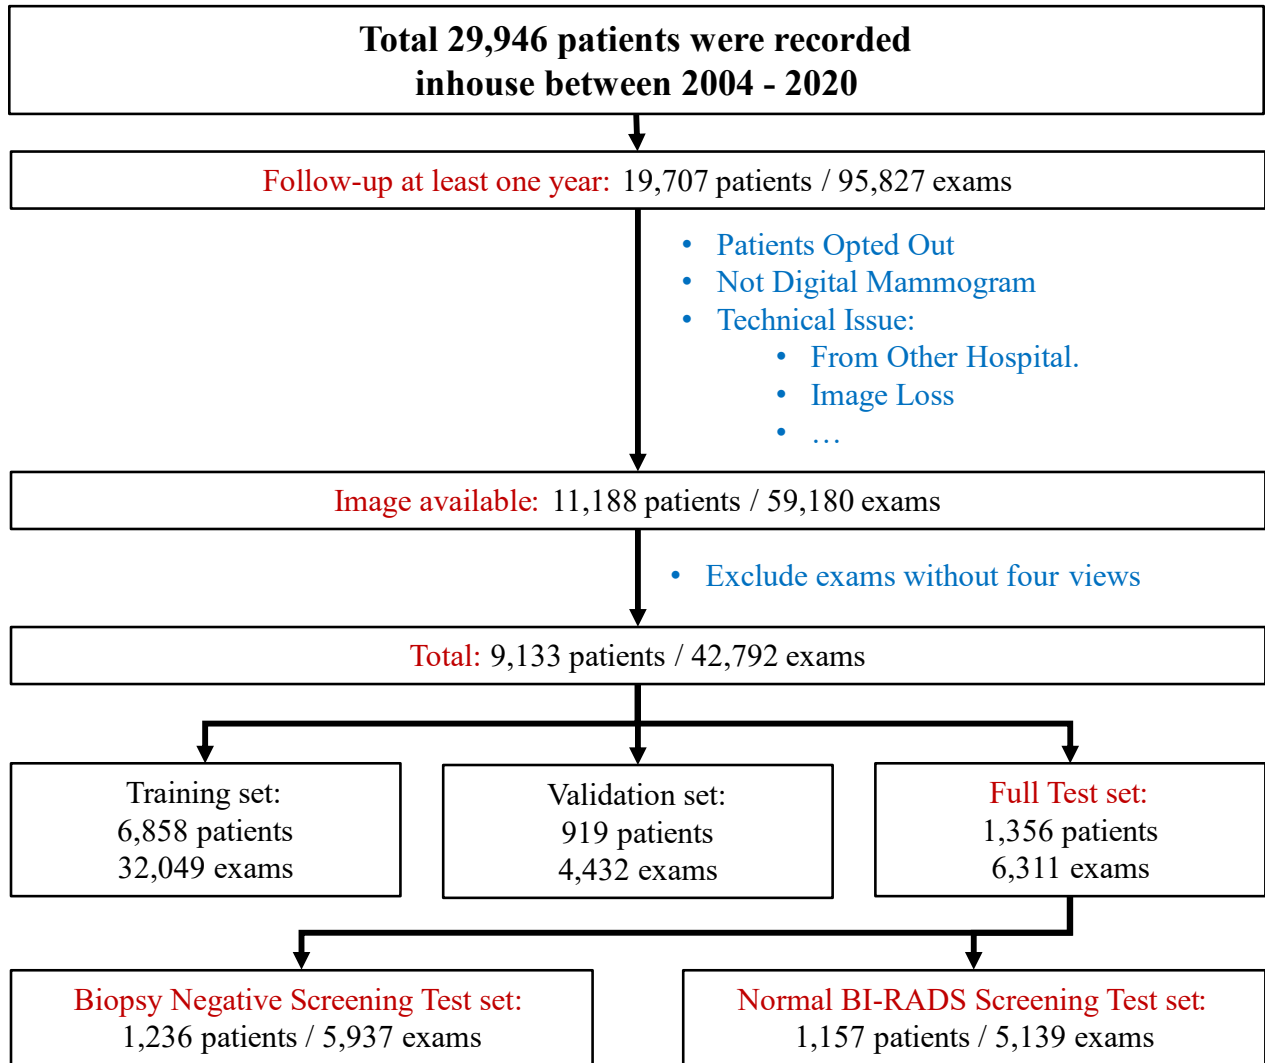

816  
817  
818  
819

**Fig. 1. The flowchart of Inhouse mammogram dataset collection for 10-year risk prediction.**

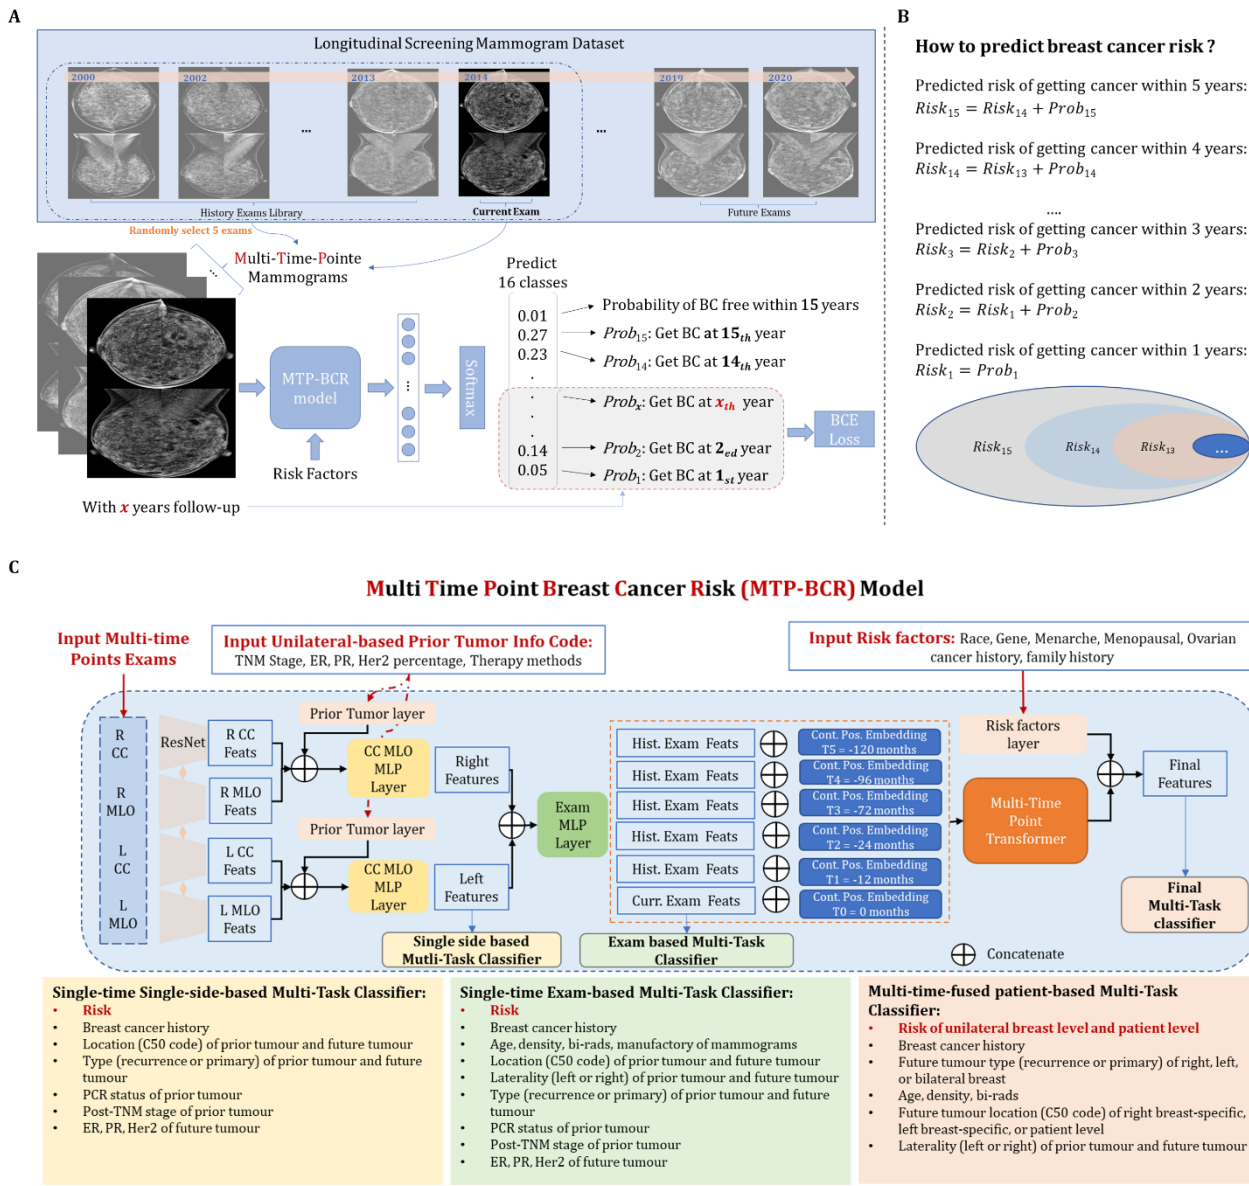

**Fig. 2. Schematic description of Multi-Time-Point Breast Cancer Risk (MTP-BCR) model.** A. Overview of selecting the multi-time points mammograms for training the MTP-BCR model. B. how to calculate the BC risk C. The details of the MTP-BCR model



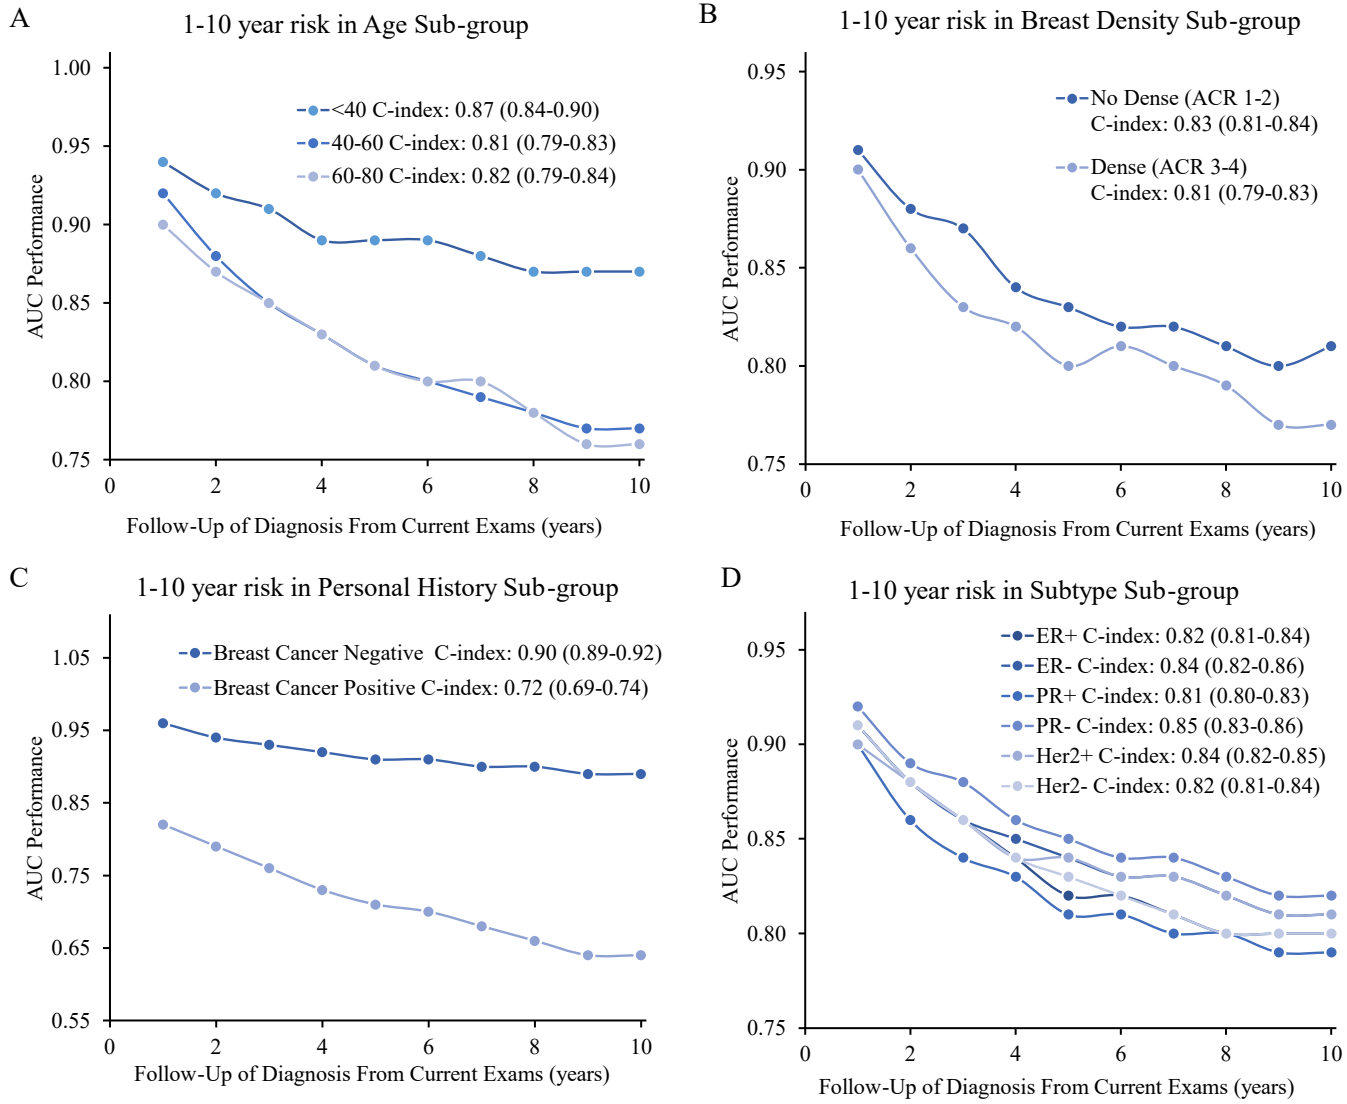

**Fig. 4. Cumulative risk at multiple time points on different sub-groups.**

839  
840



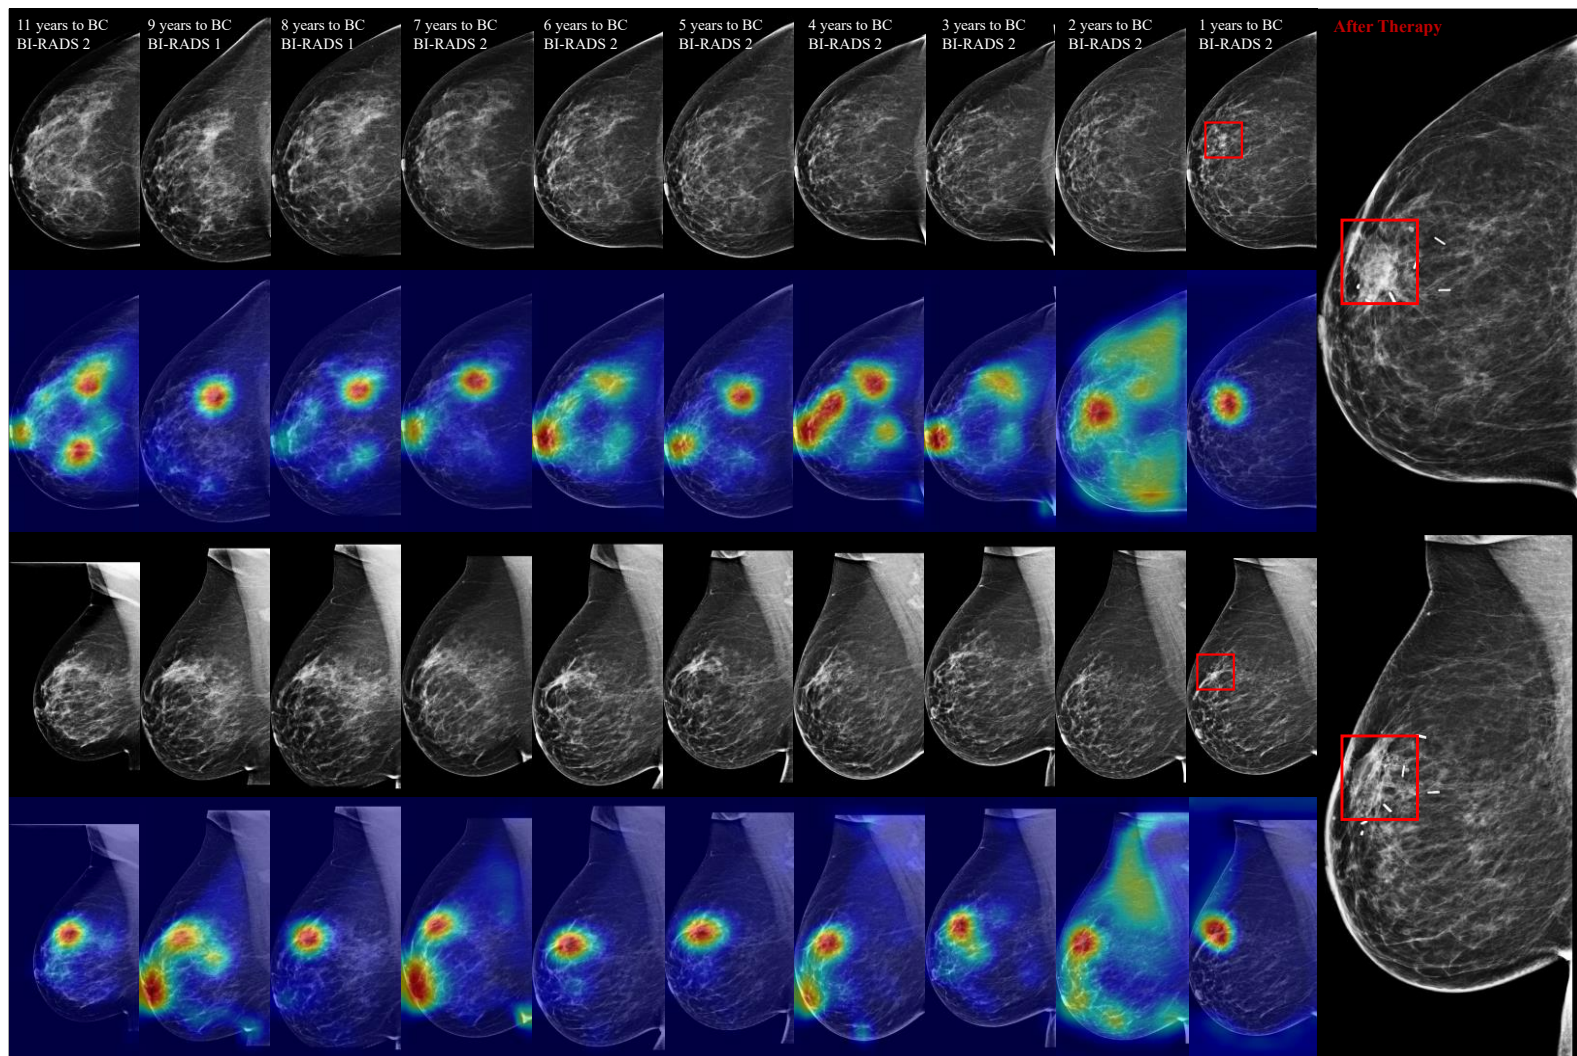

**Fig. 5. An example of class activation map (CAM) visualization.** The longitudinal craniocaudal (CC) and mediolateral oblique (MLO) mammograms were acquired from a patient who participated in ten consecutive breast cancer screening from 2005 to 2015, culminating in a breast cancer diagnosis during the last screening (invasive ductal and lobular carcinoma located at C50.4, exhibiting positive expression of estrogen receptor (ER+), progesterone receptor (PR+), and human epidermal growth factor receptor 2 (Her2Neu+)). The closer to red, the more relevant the pixel is to the risk prediction.

841  
842  
843  
844  
845  
846

847  
848  
849  
850  
851

**Table 1. Detailed demographics for the Inhouse dataset.** We categorize the number of mammography examinations into different demographic subgroups (rows) and different health subgroups (columns). The reported percentages are the number of examinations as a proportion of the total number of exams in the corresponding health conditions (Num/ColSum) and as a ratio of all exams in the same demographic sub-group (Num/RowSum).

| Sub-group                | Healthy in 5Y<br>(Num/ColSum)<br>(Num/RowSum) | Healthy in 10Y<br>(Num/ColSum)<br>(Num/RowSum) | Get BC in 1Y<br>(Num/ColSum)<br>(Num/RowSum) | Get BC in 5Y<br>(Num/ColSum)<br>(Num/RowSum) | Get BC in 10Y<br>(Num/ColSum)<br>(Num/RowSum) | All<br>(Num/ColTotal)<br>(Num/RowSum) |
|--------------------------|-----------------------------------------------|------------------------------------------------|----------------------------------------------|----------------------------------------------|-----------------------------------------------|---------------------------------------|
| <b>Total:</b>            | 36,522<br>(100%)(85.3%)                       | 34,769<br>(100%)(81.3%)                        | 3,742<br>(100%)(8.7%)                        | 6,270<br>(100%)(14.7%)                       | 8,023<br>(100%)(18.7%)                        | 42,792<br>(100%)(100%)                |
| <b>Age:</b>              |                                               |                                                |                                              |                                              |                                               |                                       |
| <40                      | 4,473<br>(12.2%)(90.1%)                       | 4,290<br>(12.3%)(86.4%)                        | 327<br>(8.7%)(6.6%)                          | 492<br>(7.8%)(9.9%)                          | 675<br>(8.4%)(13.6%)                          | 4,965<br>(11.6%)(100%)                |
| 40-50                    | 9,371<br>(25.7%)(87.0%)                       | 8,983<br>(25.8%)(83.4%)                        | 850<br>(22.7%)(7.9%)                         | 1,405<br>(22.4%)(13.0%)                      | 1,793<br>(22.3%)(16.6%)                       | 10,776<br>(25.2%)(100%)               |
| 50-60                    | 10,580<br>(29.0%)(85.6%)                      | 10,017<br>(28.8%)(81.1%)                       | 1,092<br>(29.2%)(8.8%)                       | 1,776<br>(28.3%)(14.4%)                      | 2,339<br>(29.2%)(18.9%)                       | 12,356<br>(28.9%)(100%)               |
| 60-70                    | 7,295<br>(20.0%)(81.6%)                       | 6,828<br>(19.6%)(76.4%)                        | 902<br>(24.1%)(10.1%)                        | 1,647<br>(26.3%)(18.4%)                      | 2,114<br>(26.3%)(23.6%)                       | 8,942<br>(20.9%)(100%)                |
| 70-80                    | 3,212<br>(8.8%)(83.6%)                        | 3,070<br>(8.8%)(79.9%)                         | 360<br>(9.6%)(9.4%)                          | 630<br>(10.0%)(16.4%)                        | 772<br>(9.6%)(20.1%)                          | 3,842<br>(9.0%)(100%)                 |
| >80                      | 279<br>(0.8%)(64.7%)                          | 273<br>(0.8%)(63.3%)                           | 102<br>(2.7%)(23.7%)                         | 152<br>(2.4%)(35.3%)                         | 158<br>(2.0%)(36.7%)                          | 431<br>(1.0%)(100%)                   |
| Unknown                  | 1,312<br>(3.6%)(88.6%)                        | 1,308<br>(3.8%)(88.4%)                         | 109<br>(2.9%)(7.4%)                          | 168<br>(2.7%)(11.4%)                         | 172<br>(2.1%)(11.6%)                          | 1,480<br>(3.5%)(100%)                 |
| <b>BI-RADS:</b>          |                                               |                                                |                                              |                                              |                                               |                                       |
| BI-RADS 0                | 306<br>(0.8%)(83.8%)                          | 296<br>(0.9%)(81.1%)                           | 39<br>(1.0%)(10.7%)                          | 59<br>(0.9%)(16.2%)                          | 69<br>(0.9%)(18.9%)                           | 365<br>(0.9%)(100%)                   |
| BI-RADS 1                | 6,126<br>(16.8%)(95.5%)                       | 5,913<br>(17.0%)(92.2%)                        | 66<br>(1.8%)(1.0%)                           | 290<br>(4.6%)(4.5%)                          | 503<br>(6.3%)(7.8%)                           | 6,416<br>(15.0%)(100%)                |
| BI-RADS 2                | 25,363<br>(69.4%)(91.1%)                      | 24,174<br>(69.5%)(86.8%)                       | 603<br>(16.1%)(2.2%)                         | 2,492<br>(39.7%)(8.9%)                       | 3,681<br>(45.9%)(13.2%)                       | 27,855<br>(65.1%)(100%)               |
| BI-RADS 3                | 1,052<br>(2.9%)(76.1%)                        | 991<br>(2.9%)(71.7%)                           | 245<br>(6.5%)(17.7%)                         | 331<br>(5.3%)(23.9%)                         | 392<br>(4.9%)(28.3%)                          | 1,383<br>(3.2%)(100%)                 |
| BI-RADS 4                | 242<br>(0.7%)(28.2%)                          | 230<br>(0.7%)(26.8%)                           | 590<br>(15.8%)(68.8%)                        | 616<br>(9.8%)(71.8%)                         | 628<br>(7.8%)(73.2%)                          | 858<br>(2.0%)(100%)                   |
| BI-RADS 5                | 21<br>(0.1%)(2.5%)                            | 21<br>(0.1%)(2.5%)                             | 826<br>(22.1%)(97.3%)                        | 828<br>(13.2%)(97.5%)                        | 828<br>(10.3%)(97.5%)                         | 849<br>(2.0%)(100%)                   |
| BI-RADS 6                | 0<br>(0.0%)(0.0%)                             | 0<br>(0.0%)(0.0%)                              | 917<br>(24.5%)(100%)                         | 917<br>(14.6%)(100%)                         | 917<br>(11.4%)(100%)                          | 917<br>(2.1%)(100%)                   |
| None                     | 3,412<br>(9.3%)(82.2%)                        | 3,144<br>(9.0%)(75.8%)                         | 456<br>(12.2%)(11.0%)                        | 737<br>(11.8%)(17.8%)                        | 1,005<br>(12.5%)(24.2%)                       | 4,149<br>(9.7%)(100%)                 |
| <b>Density:</b>          |                                               |                                                |                                              |                                              |                                               |                                       |
| ACR 1                    | 2,340<br>(6.4%)(86.8%)                        | 2,250<br>(6.5%)(83.5%)                         | 208<br>(5.6%)(7.7%)                          | 355<br>(5.7%)(13.2%)                         | 445<br>(5.5%)(16.5%)                          | 2,695<br>(6.3%)(100%)                 |
| ACR 2                    | 21,163<br>(57.9%)(84.7%)                      | 20,051<br>(57.7%)(80.2%)                       | 2,308<br>(61.7%)(9.2%)                       | 3,829<br>(61.1%)(15.3%)                      | 4,941<br>(61.6%)(19.8%)                       | 24,992<br>(58.4%)(100%)               |
| ACR 3                    | 9,782<br>(26.8%)(87.1%)                       | 9,385<br>(27.0%)(83.6%)                        | 812<br>(21.7%)(7.2%)                         | 1,448<br>(23.1%)(12.9%)                      | 1,845<br>(23.0%)(16.4%)                       | 11,230<br>(26.2%)(100%)               |
| ACR 4                    | 3,137<br>(8.6%)(85.7%)                        | 2,987<br>(8.6%)(81.6%)                         | 310<br>(8.3%)(8.5%)                          | 523<br>(8.3%)(14.3%)                         | 673<br>(8.4%)(18.4%)                          | 3,660<br>(8.6%)(100%)                 |
| unknown                  | 100<br>(0.3%)(46.5%)                          | 96<br>(0.3%)(44.7%)                            | 104<br>(2.8%)(48.4%)                         | 115<br>(1.8%)(53.5%)                         | 119<br>(1.5%)(55.3%)                          | 215<br>(0.5%)(100%)                   |
| <b>Race:</b>             |                                               |                                                |                                              |                                              |                                               |                                       |
| White                    | 10,820<br>(29.6%)(88.2%)                      | 10,133<br>(29.1%)(82.6%)                       | 659<br>(17.6%)(5.4%)                         | 1,446<br>(23.1%)(11.8%)                      | 2,133<br>(26.6%)(17.4%)                       | 12,266<br>(28.7%)(100%)               |
| African                  | 141<br>(0.4%)(88.1%)                          | 135<br>(0.4%)(84.4%)                           | 11<br>(0.3%)(6.9%)                           | 19<br>(0.3%)(11.9%)                          | 25<br>(0.3%)(15.6%)                           | 160<br>(0.4%)(100%)                   |
| Asian                    | 270<br>(0.7%)(91.2%)                          | 265<br>(0.8%)(89.5%)                           | 9<br>(0.2%)(3.0%)                            | 26<br>(0.4%)(8.8%)                           | 31<br>(0.4%)(10.5%)                           | 296<br>(0.7%)(100%)                   |
| Other Race               | 94<br>(0.3%)(88.7%)                           | 90<br>(0.3%)(84.9%)                            | 7<br>(0.2%)(6.6%)                            | 12<br>(0.2%)(11.3%)                          | 16<br>(0.2%)(15.1%)                           | 106<br>(0.2%)(100%)                   |
| Unknown                  | 25,197<br>(69.0%)(84.1%)                      | 24,146<br>(69.4%)(80.6%)                       | 3,056<br>(81.7%)(10.2%)                      | 4,767<br>(76.0%)(15.9%)                      | 5,818<br>(72.5%)(19.4%)                       | 29,964<br>(70.0%)(100%)               |
| <b>Continued Table 1</b> |                                               |                                                |                                              |                                              |                                               |                                       |
| <b>Gene:</b>             |                                               |                                                |                                              |                                              |                                               |                                       |
| BRCA 1 mutation          | 1,321<br>(3.6%)(83.8%)                        | 1,229<br>(3.5%)(77.9%)                         | 103<br>(2.8%)(6.5%)                          | 256<br>(4.1%)(16.2%)                         | 348<br>(4.3%)(22.1%)                          | 1,577<br>(3.7%)(100%)                 |



|                 |                          |                          |                        |                         |                         |                         |
|-----------------|--------------------------|--------------------------|------------------------|-------------------------|-------------------------|-------------------------|
| BRCA 2 mutation | 1,183<br>(3.2%)(86.3%)   | 1,115<br>(3.2%)(81.3%)   | 75 (2.0%)(5.5%)        | 188<br>(3.0%)(13.7%)    | 256<br>(3.2%)(18.7%)    | 1,371<br>(3.2%)(100%)   |
| Positive        | 2,722<br>(7.5%)(84.6%)   | 2,529<br>(7.3%)(78.6%)   | 197 (5.3%)(6.1%)       | 497<br>(7.9%)(15.4%)    | 690<br>(8.6%)(21.4%)    | 3,219<br>(7.5%)(100%)   |
| Negative        | 3,120<br>(8.5%)(78.5%)   | 2,653<br>(7.6%)(66.8%)   | 367 (9.8%)(9.2%)       | 852<br>(13.6%)(21.5%)   | 1,319<br>(16.4%)(33.2%) | 3,972<br>(9.3%)(100%)   |
| Unknow          | 30,680<br>(84.0%)(86.2%) | 29,587<br>(85.1%)(83.1%) | 3,178<br>(84.9%)(8.9%) | 4,921<br>(78.5%)(13.8%) | 6,014<br>(75.0%)(16.9%) | 35,601<br>(83.2%)(100%) |

**Menopausal Status:**

|                             |                          |                          |                         |                         |                         |                         |
|-----------------------------|--------------------------|--------------------------|-------------------------|-------------------------|-------------------------|-------------------------|
| Pre-menopausal              | 5,570<br>(15.3%)(88.7%)  | 5,333<br>(15.3%)(85.0%)  | 431<br>(11.5%)(6.9%)    | 707<br>(11.3%)(11.3%)   | 944<br>(11.8%)(15.0%)   | 6277<br>(14.7%)(100%)   |
| Peri-menopausal<br>& Unknow | 18,599<br>(50.9%)(86.9%) | 17,825<br>(51.3%)(83.3%) | 1,769<br>(47.3%)(8.3%)  | 2,792<br>(44.5%)(13.1%) | 3,566<br>(44.4%)(16.7%) | 21,391<br>(50.0%)(100%) |
| Post- menopausal            | 12,353<br>(33.8%)(81.7%) | 11,611<br>(33.4%)(76.8%) | 1,542<br>(41.2%)(10.2%) | 2,771<br>(44.2%)(18.3%) | 3,513<br>(43.8%)(23.2%) | 15,124<br>(35.3%)(100%) |

**Personal History:**

|                |                          |                          |                         |                         |                         |                         |
|----------------|--------------------------|--------------------------|-------------------------|-------------------------|-------------------------|-------------------------|
| Breast Cancer  | 18,149<br>(49.7%)(87.2%) | 17,058<br>(49.1%)(82.0%) | 985<br>(26.3%)(4.7%)    | 2,656<br>(42.4%)(12.8%) | 3,747<br>(46.7%)(18.0%) | 20,805<br>(48.6%)(100%) |
| Positive       | 18,373<br>(50.3%)(83.6%) | 17,711<br>(50.9%)(80.6%) | 2,757<br>(73.7%)(12.5%) | 3,614<br>(57.6%)(16.4%) | 4,276<br>(53.3%)(19.4%) | 21,987<br>(51.4%)(100%) |
| Negative       | 401<br>(1.1%)(79.2%)     | 368<br>(1.1%)(72.7%)     | 42<br>(1.1%)(8.3%)      | 105<br>(1.7%)(20.8%)    | 138<br>(1.7%)(27.3%)    | 506<br>(1.2%)(100%)     |
| Ovarian Cancer | 36,121<br>(98.9%)(85.4%) | 34,401<br>(98.9%)(81.4%) | 3,700<br>(98.9%)(8.7%)  | 6,165<br>(98.3%)(14.6%) | 7,885<br>(98.3%)(18.6%) | 42,286<br>(98.8%)(100%) |
| Positive       |                          |                          |                         |                         |                         |                         |
| Negative       |                          |                          |                         |                         |                         |                         |

**Menarche Age:**

|        |                          |                          |                        |                         |                         |                         |
|--------|--------------------------|--------------------------|------------------------|-------------------------|-------------------------|-------------------------|
| <12    | 854<br>(2.3%)(91.6%)     | 819<br>(2.4%)(87.9%)     | 30<br>(0.8%)(3.2%)     | 78<br>(1.2%)(8.4%)      | 113<br>(1.4%)(12.1%)    | 932<br>(2.2%)(100%)     |
| 12-15  | 4,981<br>(13.6%)(90.5%)  | 4,744<br>(13.6%)(86.2%)  | 202<br>(5.4%)(3.7%)    | 521<br>(8.3%)(9.5%)     | 758<br>(9.4%)(13.8%)    | 5,502<br>(12.9%)(100%)  |
| >15    | 228<br>(0.6%)(90.8%)     | 223<br>(0.6%)(88.8%)     | 9<br>(0.2%)(3.6%)      | 23<br>(0.4%)(9.2%)      | 28<br>(0.3%)(11.2%)     | 251<br>(0.6%)(100%)     |
| Unknow | 30,459<br>(83.4%)(84.4%) | 28,983<br>(83.4%)(80.3%) | 3,501<br>(93.6%)(9.7%) | 5,648<br>(90.1%)(15.6%) | 7,124<br>(88.8%)(19.7%) | 36,107<br>(84.4%)(100%) |

**Family History:**

|                |                          |                          |                        |                         |                         |                         |
|----------------|--------------------------|--------------------------|------------------------|-------------------------|-------------------------|-------------------------|
| Breast Cancer  | 25,687<br>(70.3%)(83.2%) | 24,026<br>(69.1%)(77.8%) | 2,908<br>(77.7%)(9.4%) | 5,191<br>(82.8%)(16.8%) | 6,852<br>(85.4%)(22.2%) | 30,878<br>(72.2%)(100%) |
| Positive       | 10,835<br>(29.7%)(90.9%) | 10,743<br>(30.9%)(90.2%) | 834<br>(22.3%)(7.0%)   | 1,079<br>(17.2%)(9.1%)  | 1,171<br>(14.6%)(9.8%)  | 11,914<br>(27.8%)(100%) |
| Negative       | 2,155<br>(5.9%)(85.5%)   | 2,009<br>(5.8%)(79.8%)   | 150<br>(4.0%)(6.0%)    | 364<br>(5.8%)(14.5%)    | 510<br>(6.4%)(20.2%)    | 2,519<br>(5.9%)(100%)   |
| Ovarian Cancer | 34,367<br>(94.1%)(85.3%) | 32,760<br>(94.2%)(81.3%) | 3,592<br>(96.0%)(8.9%) | 5,906<br>(94.2%)(14.7%) | 7,513<br>(93.6%)(18.7%) | 40,273<br>(94.1%)(100%) |
| Positive       |                          |                          |                        |                         |                         |                         |
| Negative       |                          |                          |                        |                         |                         |                         |

**Manufacturer:**

|                    |                         |                          |                         |                         |                         |                         |
|--------------------|-------------------------|--------------------------|-------------------------|-------------------------|-------------------------|-------------------------|
| Hologic Selenia    | 5,648<br>(15.5%)(81.2%) | 5,220<br>(15.0%)(75.1%)  | 880<br>(23.5%)(12.7%)   | 1,307<br>(20.8%)(18.8%) | 1,735<br>(21.6%)(24.9%) | 6,955<br>(16.3%)(100%)  |
| Lorad Selenia      | 9,543<br>(26.1%)(82.2%) | 8,870<br>(25.5%)(76.4%)  | 1,352<br>(36.1%)(11.6%) | 2,072<br>(33.0%)(17.8%) | 2,745<br>(34.2%)(23.6%) | 11,615<br>(27.1%)(100%) |
| Selenia Dimensions | 21184<br>(58.0%)(89.6%) | 20,539<br>(59.1%)(86.8%) | 1,100<br>(29.4%)(4.7%)  | 2,465<br>(39.3%)(10.4%) | 3,110<br>(38.8%)(13.2%) | 23,649<br>(55.3%)(100%) |

**Train Val Test:**

|       |                          |                          |                        |                         |                         |                         |
|-------|--------------------------|--------------------------|------------------------|-------------------------|-------------------------|-------------------------|
| Train | 27,294<br>(74.7%)(85.2%) | 25,991<br>(74.8%)(81.1%) | 2,853<br>(76.2%)(8.9%) | 4,755<br>(75.8%)(14.8%) | 6,058<br>(75.5%)(18.9%) | 32,049<br>(74.9%)(100%) |
| Valid | 3,786<br>(10.4%)(85.4%)  | 3,599<br>(10.4%)(81.2%)  | 378<br>(10.1%)(8.5%)   | 646<br>(10.3%)(14.6%)   | 833<br>(10.4%)(18.8%)   | 4,432<br>(10.4%)(100%)  |
| Test  | 5,442<br>(14.9%)(86.2%)  | 5,179<br>(14.9%)(82.1%)  | 511<br>(13.7%)(8.1%)   | 869<br>(13.9%)(13.8%)   | 1,132<br>(14.1%)(17.9%) | 6,311<br>(14.7%)(100%)  |

**Table 2. Comparison of 10-year risk predictions on full test set.** C-index and AUC results are presented with 95% Confidence Interval. Note that results of the BCSC model are based on the part of the full inhouse test set, as they are out of the age range of 35-74 or with prior BC history. For a fair comparison, we also implemented the comparison experiments excluding the women that did not have scores from the BCSC model, Shown in Fig. 3. The black fonts represent the performance of the target tasks for which different methods were originally designed to. The gray fonts represent the AUC metric of 1- to 10- years BC risk for these methods we explored. Bold:  $P < 0.05$ , the AUCs of our methods are significantly higher than all other model for the same time horizon (except BCSC risk model).

| Use Risk Factors                                                                                                                                    | BI-RADS     | BCSC*       | GMIC        | MIRAI Test  | MIRAI Finetune | MTP-BCR (Ours) Patient Level |             | MTP-BCR (Ours) Unilateral Breast Level |             |
|-----------------------------------------------------------------------------------------------------------------------------------------------------|-------------|-------------|-------------|-------------|----------------|------------------------------|-------------|----------------------------------------|-------------|
|                                                                                                                                                     | -           | Yes         | No          | -           | -              | No                           | Yes         | No                                     | Yes         |
| Full inhouse test set: 6,311 exams, 511 followed by cancer diagnosis within 1 years; 869 diagnosis within 5 years; 1,132 diagnosis within 10 years. |             |             |             |             |                |                              |             |                                        |             |
| 5-Year                                                                                                                                              | 0.71        | 0.63        | 0.7         | 0.67        | 0.75           | 0.78                         | 0.84        | 0.78                                   | 0.82        |
| C-Index                                                                                                                                             | (0.70-0.73) | (0.61-0.65) | (0.68-0.72) | (0.65-0.69) | (0.73-0.77)    | (0.76-0.80)                  | (0.82-0.85) | (0.76-0.80)                            | (0.81-0.84) |
| 10-Year                                                                                                                                             | 0.69        | 0.64        | 0.69        | 0.67        | 0.73           | 0.77                         | 0.82        | 0.76                                   | 0.81        |
| C-Index                                                                                                                                             | (0.67-0.70) | (0.61-0.66) | (0.67-0.70) | (0.65-0.68) | (0.72-0.75)    | (0.75-0.78)                  | (0.81-0.84) | (0.75-0.78)                            | (0.79-0.82) |
| 1-Year                                                                                                                                              | 0.83        | 0.62        | 0.74        | 0.70        | 0.84           | 0.87                         | 0.91        | 0.87                                   | 0.89        |
| AUC                                                                                                                                                 | (0.81-0.85) | (0.58-0.64) | (0.72-0.77) | (0.68-0.73) | (0.81-0.86)    | (0.85-0.89)                  | (0.89-0.92) | (0.85-0.89)                            | (0.87-0.91) |
| 2-Year                                                                                                                                              | 0.78        | 0.62        | 0.72        | 0.69        | 0.80           | 0.83                         | 0.88        | 0.83                                   | 0.87        |
| AUC                                                                                                                                                 | (0.76-0.80) | (0.59-0.65) | (0.70-0.75) | (0.66-0.71) | (0.78-0.82)    | (0.81-0.85)                  | (0.86-0.89) | (0.81-0.85)                            | (0.85-0.88) |
| 3-Year                                                                                                                                              | 0.74        | 0.63        | 0.72        | 0.69        | 0.78           | 0.80                         | 0.86        | 0.80                                   | 0.84        |
| AUC                                                                                                                                                 | (0.72-0.76) | (0.61-0.66) | (0.69-0.74) | (0.67-0.72) | (0.76-0.80)    | (0.79-0.82)                  | (0.84-0.87) | (0.79-0.82)                            | (0.83-0.86) |
| 4-Year                                                                                                                                              | 0.72        | 0.64        | 0.71        | 0.69        | 0.76           | 0.79                         | 0.84        | 0.79                                   | 0.82        |
| AUC                                                                                                                                                 | (0.70-0.73) | (0.61-0.67) | (0.69-0.73) | (0.67-0.71) | (0.74-0.78)    | (0.77-0.80)                  | (0.82-0.85) | (0.77-0.81)                            | (0.81-0.84) |
| 5-Year                                                                                                                                              | 0.70        | 0.65        | 0.70        | 0.70        | 0.74           | 0.77                         | 0.82        | 0.77                                   | 0.81        |
| AUC                                                                                                                                                 | (0.68-0.71) | (0.62-0.68) | (0.68-0.72) | (0.68-0.72) | (0.72-0.76)    | (0.75-0.79)                  | (0.81-0.84) | (0.75-0.79)                            | (0.79-0.82) |
| 6-Year                                                                                                                                              | 0.68        | 0.66        | 0.70        | 0.70        | 0.73           | 0.77                         | 0.82        | 0.76                                   | 0.80        |
| AUC                                                                                                                                                 | (0.67-0.70) | (0.63-0.69) | (0.68-0.72) | (0.68-0.72) | (0.71-0.75)    | (0.75-0.79)                  | (0.80-0.83) | (0.75-0.78)                            | (0.78-0.81) |
| 7-Year                                                                                                                                              | 0.67        | 0.67        | 0.70        | 0.70        | 0.73           | 0.76                         | 0.81        | 0.76                                   | 0.79        |
| AUC                                                                                                                                                 | (0.66-0.69) | (0.65-0.70) | (0.68-0.72) | (0.68-0.72) | (0.71-0.75)    | (0.74-0.78)                  | (0.80-0.83) | (0.74-0.77)                            | (0.77-0.80) |
| 8-Year                                                                                                                                              | 0.66        | 0.69        | 0.69        | 0.69        | 0.72           | 0.76                         | 0.80        | 0.75                                   | 0.78        |
| AUC                                                                                                                                                 | (0.65-0.68) | (0.66-0.71) | (0.67-0.71) | (0.67-0.71) | (0.70-0.74)    | (0.74-0.78)                  | (0.79-0.82) | (0.74-0.77)                            | (0.76-0.79) |
| 9-Year                                                                                                                                              | 0.65        | 0.70        | 0.69        | 0.68        | 0.71           | 0.76                         | 0.80        | 0.75                                   | 0.77        |
| AUC                                                                                                                                                 | (0.64-0.67) | (0.67-0.73) | (0.67-0.71) | (0.66-0.70) | (0.69-0.73)    | (0.74-0.78)                  | (0.78-0.81) | (0.74-0.77)                            | (0.75-0.78) |
| 10-Year                                                                                                                                             | 0.65        | 0.71        | 0.69        | 0.67        | 0.71           | 0.77                         | 0.80        | 0.76                                   | 0.77        |
| AUC                                                                                                                                                 | (0.63-0.66) | (0.68-0.74) | (0.66-0.71) | (0.65-0.70) | (0.68-0.73)    | (0.75-0.79)                  | (0.78-0.82) | (0.74-0.77)                            | (0.75-0.78) |

**Table 3. Comparison of 10-year risk predictions on Screening Test sets.** C-index and AUC results are presented with 95% Confidence Interval. Note that results of the BCSC model are based on part of the test sets- as they are out of the age range of 35-74 or with prior BC history. For fair comparison we also impended the comparison experiments excluding the women that did not score across the BCSC model Show as Fig. 3. The black fonts represent the performance of the target tasks for which different methods were originally designed to. The gray fonts represent the AUC metric of 1- to 10- years BC risk for these methods we explored. Bold:  $P < 0.05$ , the AUCs of our methods are significantly higher than all other model for the same time horizon (except BCSC risk model).

| Use Risk Factors                                                                                                                                                              | BI-RADS     | BCSC *      | GMIC        | MIRAI Test  | MIRAI Finetune | MTP-BCR (Ours) Patient Level |                    | MTP-BCR (Ours) Unilateral Breast Level |             |
|-------------------------------------------------------------------------------------------------------------------------------------------------------------------------------|-------------|-------------|-------------|-------------|----------------|------------------------------|--------------------|----------------------------------------|-------------|
|                                                                                                                                                                               | -           | Yes         | No          | -           | -              | No                           | Yes                | No                                     | Yes         |
| <b>Inhouse Biopsy Negative Screening Test set: 5,937 exams, 137 followed by cancer diagnosis within 1 years; 495 diagnosis within 5 years; 758 diagnosis within 10 years.</b> |             |             |             |             |                |                              |                    |                                        |             |
| 5-Year                                                                                                                                                                        | 0.54        | 0.69        | 0.61        | 0.63        | 0.64           | 0.65                         | 0.74               | 0.65                                   | 0.73        |
| C-index                                                                                                                                                                       | (0.53-0.56) | (0.65-0.72) | (0.59-0.64) | (0.60-0.65) | (0.62-0.66)    | (0.63-0.68)                  | (0.72-0.76)        | (0.63-0.67)                            | (0.71-0.75) |
| 10-Year                                                                                                                                                                       | 0.53        | 0.69        | 0.61        | 0.62        | 0.64           | 0.65                         | 0.74               | 0.65                                   | 0.72        |
| C-index                                                                                                                                                                       | (0.52-0.55) | (0.66-0.72) | (0.59-0.63) | (0.60-0.64) | (0.62-0.66)    | (0.63-0.67)                  | (0.72-0.76)        | (0.63-0.67)                            | (0.71-0.74) |
| 1-Year                                                                                                                                                                        | 0.61        | 0.70        | 0.59        | 0.63        | 0.65           | 0.70                         | <b>0.77</b>        | 0.68                                   | 0.76        |
| AUC                                                                                                                                                                           | (0.57-0.65) | (0.63-0.76) | (0.54-0.65) | (0.58-0.68) | (0.60-0.70)    | (0.65-0.74)                  | <b>(0.73-0.81)</b> | (0.62-0.73)                            | (0.71-0.81) |
| 2-Year                                                                                                                                                                        | 0.58        | 0.69        | 0.61        | 0.62        | 0.64           | 0.67                         | <b>0.75</b>        | 0.66                                   | 0.75        |
| AUC                                                                                                                                                                           | (0.55-0.60) | (0.64-0.75) | (0.57-0.65) | (0.58-0.66) | (0.60-0.67)    | (0.63-0.70)                  | <b>(0.71-0.78)</b> | (0.62-0.70)                            | (0.72-0.79) |
| 3-Year                                                                                                                                                                        | 0.55        | 0.70        | 0.62        | 0.65        | 0.65           | 0.66                         | <b>0.75</b>        | 0.66                                   | 0.74        |
| AUC                                                                                                                                                                           | (0.54-0.58) | (0.65-0.74) | (0.59-0.65) | (0.62-0.68) | (0.62-0.68)    | (0.63-0.69)                  | <b>(0.72-0.77)</b> | (0.63-0.69)                            | (0.71-0.77) |
| 4-Year                                                                                                                                                                        | 0.54        | 0.70        | 0.63        | 0.64        | 0.65           | 0.66                         | <b>0.74</b>        | 0.66                                   | 0.72        |
| AUC                                                                                                                                                                           | (0.53-0.56) | (0.65-0.74) | (0.60-0.65) | (0.62-0.67) | (0.62-0.68)    | (0.63-0.68)                  | <b>(0.71-0.76)</b> | (0.63-0.68)                            | (0.70-0.75) |
| 5-Year                                                                                                                                                                        | 0.54        | 0.70        | 0.62        | 0.65        | 0.66           | 0.66                         | <b>0.73</b>        | 0.66                                   | 0.72        |
| AUC                                                                                                                                                                           | (0.52-0.55) | (0.65-0.74) | (0.60-0.65) | (0.63-0.68) | (0.63-0.68)    | (0.63-0.68)                  | <b>(0.71-0.76)</b> | (0.63-0.68)                            | (0.69-0.74) |
| 6-Year                                                                                                                                                                        | 0.53        | 0.71        | 0.63        | 0.65        | 0.67           | 0.66                         | <b>0.74</b>        | 0.66                                   | 0.72        |
| AUC                                                                                                                                                                           | (0.52-0.55) | (0.67-0.74) | (0.60-0.65) | (0.63-0.68) | (0.65-0.70)    | (0.64-0.69)                  | <b>(0.71-0.76)</b> | (0.64-0.68)                            | (0.69-0.74) |
| 7-Year                                                                                                                                                                        | 0.53        | 0.71        | 0.63        | 0.66        | 0.67           | 0.67                         | <b>0.74</b>        | 0.66                                   | 0.71        |
| AUC                                                                                                                                                                           | (0.52-0.54) | (0.68-0.75) | (0.60-0.65) | (0.63-0.68) | (0.65-0.70)    | (0.64-0.69)                  | <b>(0.72-0.76)</b> | (0.64-0.68)                            | (0.69-0.73) |
| 8-Year                                                                                                                                                                        | 0.53        | 0.72        | 0.62        | 0.65        | 0.68           | 0.67                         | <b>0.73</b>        | 0.67                                   | 0.70        |
| AUC                                                                                                                                                                           | (0.51-0.54) | (0.69-0.75) | (0.60-0.64) | (0.62-0.67) | (0.65-0.70)    | (0.65-0.69)                  | <b>(0.71-0.75)</b> | (0.64-0.69)                            | (0.68-0.72) |
| 9-Year                                                                                                                                                                        | 0.52        | 0.73        | 0.62        | 0.64        | 0.68           | 0.68                         | <b>0.73</b>        | 0.67                                   | 0.69        |
| AUC                                                                                                                                                                           | (0.51-0.53) | (0.69-0.76) | (0.60-0.65) | (0.61-0.66) | (0.65-0.70)    | (0.65-0.70)                  | <b>(0.70-0.75)</b> | (0.65-0.69)                            | (0.67-0.71) |
| 10-Year                                                                                                                                                                       | 0.52        | 0.74        | 0.63        | 0.63        | 0.68           | 0.70                         | <b>0.73</b>        | 0.68                                   | 0.69        |
| AUC                                                                                                                                                                           | (0.51-0.53) | (0.70-0.77) | (0.60-0.66) | (0.60-0.66) | (0.66-0.71)    | (0.67-0.72)                  | <b>(0.71-0.75)</b> | (0.66-0.70)                            | (0.67-0.72) |
| <b>Inhouse Normal BI-RADS Screening Test set: 5,139 exams, 102 followed by cancer diagnosis within 1 years; 404 diagnosis within 5 years; 612 diagnosis within 10 years.</b>  |             |             |             |             |                |                              |                    |                                        |             |
| 5-Year                                                                                                                                                                        | 0.51        | 0.68        | 0.61        | 0.62        | 0.62           | 0.64                         | <b>0.73</b>        | 0.65                                   | 0.73        |
| C-index                                                                                                                                                                       | (0.50-0.51) | (0.64-0.72) | (0.59-0.64) | (0.60-0.65) | (0.59-0.64)    | (0.62-0.67)                  | <b>(0.71-0.75)</b> | (0.63-0.68)                            | (0.71-0.75) |
| 10-Year                                                                                                                                                                       | 0.50        | 0.69        | 0.61        | 0.62        | 0.62           | 0.64                         | <b>0.73</b>        | 0.65                                   | 0.73        |
| C-index                                                                                                                                                                       | (0.50-0.51) | (0.66-0.72) | (0.59-0.64) | (0.60-0.64) | (0.60-0.65)    | (0.62-0.67)                  | <b>(0.71-0.75)</b> | (0.63-0.67)                            | (0.71-0.75) |
| 1-Year                                                                                                                                                                        | 0.53        | 0.70        | 0.61        | 0.62        | 0.63           | 0.66                         | <b>0.74</b>        | 0.68                                   | 0.77        |
| AUC                                                                                                                                                                           | (0.50-0.55) | (0.63-0.77) | (0.54-0.67) | (0.57-0.68) | (0.57-0.68)    | (0.60-0.71)                  | <b>(0.69-0.79)</b> | (0.63-0.73)                            | (0.72-0.81) |
| 2-Year                                                                                                                                                                        | 0.51        | 0.69        | 0.60        | 0.62        | 0.61           | 0.64                         | <b>0.73</b>        | 0.67                                   | 0.75        |
| AUC                                                                                                                                                                           | (0.50-0.53) | (0.63-0.75) | (0.56-0.65) | (0.58-0.66) | (0.57-0.65)    | (0.60-0.68)                  | <b>(0.69-0.76)</b> | (0.63-0.71)                            | (0.72-0.79) |
| 3-Year                                                                                                                                                                        | 0.51        | 0.70        | 0.62        | 0.65        | 0.63           | 0.64                         | <b>0.73</b>        | 0.66                                   | 0.74        |
| AUC                                                                                                                                                                           | (0.50-0.52) | (0.64-0.74) | (0.58-0.66) | (0.61-0.68) | (0.59-0.66)    | (0.61-0.68)                  | <b>(0.70-0.76)</b> | (0.62-0.69)                            | (0.71-0.77) |
| 4-Year                                                                                                                                                                        | 0.51        | 0.69        | 0.63        | 0.64        | 0.63           | 0.64                         | <b>0.72</b>        | 0.66                                   | 0.73        |
| AUC                                                                                                                                                                           | (0.50-0.51) | (0.65-0.74) | (0.60-0.66) | (0.61-0.67) | (0.60-0.66)    | (0.62-0.67)                  | <b>(0.70-0.75)</b> | (0.63-0.68)                            | (0.70-0.75) |
| 5-Year                                                                                                                                                                        | 0.51        | 0.70        | 0.62        | 0.65        | 0.64           | 0.65                         | <b>0.72</b>        | 0.66                                   | 0.72        |
| AUC                                                                                                                                                                           | (0.50-0.51) | (0.65-0.74) | (0.59-0.65) | (0.62-0.68) | (0.61-0.67)    | (0.62-0.67)                  | <b>(0.70-0.75)</b> | (0.63-0.68)                            | (0.69-0.74) |
| 6-Year                                                                                                                                                                        | 0.50        | 0.71        | 0.63        | 0.66        | 0.66           | 0.65                         | <b>0.73</b>        | 0.66                                   | 0.72        |
| AUC                                                                                                                                                                           | (0.50-0.51) | (0.66-0.75) | (0.60-0.65) | (0.63-0.68) | (0.63-0.68)    | (0.63-0.68)                  | <b>(0.71-0.76)</b> | (0.63-0.68)                            | (0.70-0.74) |
| 7-Year                                                                                                                                                                        | 0.50        | 0.71        | 0.63        | 0.66        | 0.66           | 0.66                         | <b>0.73</b>        | 0.66                                   | 0.71        |
| AUC                                                                                                                                                                           | (0.50-0.51) | (0.67-0.75) | (0.60-0.66) | (0.63-0.69) | (0.64-0.69)    | (0.63-0.68)                  | <b>(0.71-0.76)</b> | (0.64-0.68)                            | (0.69-0.73) |
| 8-Year                                                                                                                                                                        | 0.50        | 0.72        | 0.63        | 0.66        | 0.67           | 0.67                         | <b>0.73</b>        | 0.67                                   | 0.71        |
| AUC                                                                                                                                                                           | (0.50-0.51) | (0.68-0.76) | (0.60-0.65) | (0.63-0.68) | (0.65-0.70)    | (0.64-0.69)                  | <b>(0.71-0.75)</b> | (0.64-0.69)                            | (0.68-0.73) |
| 9-Year                                                                                                                                                                        | 0.50        | 0.73        | 0.63        | 0.65        | 0.67           | 0.67                         | <b>0.73</b>        | 0.67                                   | 0.70        |
| AUC                                                                                                                                                                           | (0.50-0.51) | (0.69-0.76) | (0.60-0.66) | (0.62-0.68) | (0.64-0.70)    | (0.65-0.70)                  | <b>(0.70-0.75)</b> | (0.65-0.69)                            | (0.67-0.72) |
| 10-Year                                                                                                                                                                       | 0.50        | 0.74        | 0.63        | 0.64        | 0.67           | 0.69                         | <b>0.73</b>        | 0.68                                   | 0.70        |
| AUC                                                                                                                                                                           | (0.50-0.51) | (0.70-0.77) | (0.60-0.66) | (0.61-0.67) | (0.65-0.70)    | (0.67-0.72)                  | <b>(0.71-0.76)</b> | (0.66-0.70)                            | (0.67-0.72) |

**Table 4. Comparison of future risk predictions.** AUC results are presented with 95% Confidence Interval. BCSC: Breast Cancer Surveillance Consortium; GMIC: Globally-Aware Multiple Instance Classifier. Note that results of the BCSC model are based on part of the full inhouse test set, as they are out of the age range of 35-74 or with prior BC history. For fair comparison we also impended the comparison experiments excluding the women that did not score across the BCSC model. Bold:  $P < 0.05$ , the AUCs of our methods are significantly higher than all other model for the same time horizon.

| Use Risk Factors                                                                    | BI-RADS     | BCSC        | GMIC        | MIRAI Test  | MIRAI Finetune | MTP-BCR (Ours) Patient Level |                    | MTP-BCR (Ours) Unilateral Breast Level |             |
|-------------------------------------------------------------------------------------|-------------|-------------|-------------|-------------|----------------|------------------------------|--------------------|----------------------------------------|-------------|
|                                                                                     | -           | Yes         | No          | -           | -              | No                           | Yes                | No                                     | Yes         |
| <b>Full test set</b>                                                                |             |             |             |             |                |                              |                    |                                        |             |
| 2-5 Year                                                                            | 0.51        | -           | 0.63        | 0.64        | 0.60           | 0.64                         | <b>0.72</b>        | 0.65                                   | 0.71        |
| AUC                                                                                 | (0.50-0.52) | -           | (0.60-0.66) | (0.61-0.67) | (0.57-0.63)    | (0.61-0.66)                  | <b>(0.69-0.74)</b> | (0.62-0.67)                            | (0.68-0.73) |
| 4-5 Year                                                                            | 0.50        | -           | 0.61        | 0.62        | 0.58           | 0.63                         | <b>0.72</b>        | 0.63                                   | 0.69        |
| AUC                                                                                 | (0.49-0.52) | -           | (0.57-0.65) | (0.58-0.66) | (0.53-0.63)    | (0.59-0.66)                  | <b>(0.68-0.75)</b> | (0.59-0.67)                            | (0.66-0.73) |
| 2-10 Year                                                                           | 0.50        | -           | 0.63        | 0.62        | 0.60           | <b>0.68</b>                  | <b>0.73</b>        | 0.67                                   | 0.69        |
| AUC                                                                                 | (0.49-0.51) | -           | (0.60-0.65) | (0.59-0.65) | (0.57-0.62)    | <b>(0.66-0.71)</b>           | <b>(0.70-0.75)</b> | (0.65-0.69)                            | (0.66-0.71) |
| 4-10 Year                                                                           | 0.50        | -           | 0.61        | 0.60        | 0.59           | <b>0.67</b>                  | <b>0.73</b>        | 0.66                                   | 0.68        |
| AUC                                                                                 | (0.49-0.51) | -           | (0.58-0.64) | (0.57-0.63) | (0.56-0.62)    | <b>(0.64-0.70)</b>           | <b>(0.70-0.75)</b> | (0.64-0.68)                            | (0.66-0.71) |
| 6-10 Year                                                                           | 0.50        | -           | 0.60        | 0.58        | 0.60           | <b>0.67</b>                  | <b>0.73</b>        | 0.65                                   | 0.69        |
| AUC                                                                                 | (0.49-0.52) | -           | (0.57-0.64) | (0.55-0.62) | (0.56-0.63)    | <b>(0.63-0.70)</b>           | <b>(0.70-0.76)</b> | (0.62-0.68)                            | (0.66-0.72) |
| <b>Part of Full test set: only women who completed scored across the BCSC model</b> |             |             |             |             |                |                              |                    |                                        |             |
| 2-5 Year                                                                            | 0.52        | 0.69        | 0.66        | 0.67        | 0.59           | 0.69                         | <b>0.76</b>        | 0.69                                   | 0.74        |
| AUC                                                                                 | (0.49-0.55) | (0.64-0.74) | (0.61-0.71) | (0.62-0.71) | (0.54-0.65)    | (0.64-0.74)                  | <b>(0.72-0.80)</b> | (0.65-0.74)                            | (0.70-0.78) |
| 4-5 Year                                                                            | 0.50        | 0.67        | 0.64        | 0.64        | 0.57           | 0.68                         | <b>0.76</b>        | 0.66                                   | 0.73        |
| AUC                                                                                 | (0.47-0.53) | (0.60-0.74) | (0.58-0.71) | (0.57-0.70) | (0.49-0.64)    | (0.61-0.74)                  | <b>(0.71-0.81)</b> | (0.60-0.73)                            | (0.68-0.78) |
| 2-10 Year                                                                           | 0.52        | 0.73        | 0.63        | 0.64        | 0.57           | 0.73                         | <b>0.79</b>        | 0.72                                   | 0.72        |
| AUC                                                                                 | (0.50-0.54) | (0.69-0.77) | (0.59-0.67) | (0.60-0.69) | (0.53-0.62)    | (0.69-0.77)                  | <b>(0.75-0.82)</b> | (0.68-0.75)                            | (0.68-0.75) |
| 4-10 Year                                                                           | 0.51        | 0.72        | 0.62        | 0.62        | 0.56           | 0.72                         | <b>0.79</b>        | 0.70                                   | 0.72        |
| AUC                                                                                 | (0.49-0.53) | (0.67-0.76) | (0.57-0.67) | (0.57-0.67) | (0.51-0.61)    | (0.68-0.76)                  | <b>(0.75-0.82)</b> | (0.66-0.74)                            | (0.68-0.75) |
| 6-10 Year                                                                           | 0.51        | 0.71        | 0.61        | 0.61        | 0.56           | 0.70                         | <b>0.79</b>        | 0.68                                   | 0.73        |
| AUC                                                                                 | (0.49-0.54) | (0.66-0.76) | (0.55-0.67) | (0.55-0.66) | (0.50-0.63)    | (0.65-0.75)                  | <b>(0.75-0.83)</b> | (0.64-0.73)                            | (0.68-0.77) |
